# Evidence that Xrn1 is in complex with Gcn1, and is required for full levels of eIF2 $\alpha$ phosphorylation.

Renuka Shanmugam,<sup>1\*</sup> Reuben Anderson,<sup>1,2\*</sup>  
Anja H. Schiemann,<sup>2</sup> and Evelyn Sattlegger<sup>1,2,3#</sup>

<sup>1</sup> School of Natural Sciences, Massey University, Auckland, New Zealand

<sup>2</sup> School of Natural Sciences, Massey University, Palmerston North, New Zealand

<sup>3</sup> Maurice Wilkins Centre for Molecular BioDiscovery, Massey University, Palmerston North, New Zealand

\* These authors contributed equally to this manuscript

#Corresponding author:

Evelyn Sattlegger

School of Natural Sciences

e.sattlegger@massey.ac.nz

**Keywords:** Gcn1, Gcn2, protein-protein interaction, eIF2 $\alpha$ , General Amino Acid Control

**Abbreviations:** **3AT** - 3-amino-1,2,4-triazole; **GAAC** - General Amino Acid Control; **Gcn** - General control non-derepressible; **slg<sup>-</sup>** - slow growth; **RWD** - a domain found in **RING** finger-containing proteins, **WD-repeat**-containing proteins, and yeast **DEAD (DEXD)**-like helicases; **SM<sup>s</sup>** - sulfometuron Methyl sensitivity; **RWDBD** - RWD binding domain; **SDS-PAGE** - SDS polyacrylamide gel electrophoresis

## Abstract

The protein kinase Gcn2 and its effector protein Gcn1 are part of the General Amino Acid Control signalling (GAAC) pathway best known in yeast for its function in maintaining amino acid homeostasis. Under amino acid limitation, Gcn2 becomes activated, subsequently increasing the levels of phosphorylated eIF2 $\alpha$  (eIF2 $\alpha$ -P). This leads to the increased translation of transcriptional regulators, such as Gcn4 in yeast and ATF4 in mammals, and subsequent re-programming of the cell's gene transcription profile, thereby allowing cells to cope with starvation. Xrn1 is involved in RNA decay, quality control and processing. We found that Xrn1 co-precipitates Gcn1 and Gcn2, suggesting that these three proteins are in the same complex. Growth under starvation conditions was dependent on Xrn1 but not on Xrn1-ribosome association, and this correlated with reduced eIF2 $\alpha$ -P levels. Constitutively active Gcn2 leads to a growth defect due to eIF2 $\alpha$ -hyperphosphorylation, and we found that this phenotype was independent of Xrn1, suggesting that *xrn1* deletion doesn't enhance eIF2 $\alpha$  de-phosphorylation. Our study provides evidence that Xrn1 is required for efficient Gcn2 activation, directly or indirectly. Thus, we have uncovered a potential new link between RNA metabolism and the GAAC.

## Introduction

Virtually all Eukaryotic cells harbour an ancient signal transduction pathway that allows them to cope with amino acid starvation conditions [1]. In this pathway, the cytosolic protein kinase Gcn2 monitors amino acid availability. Under amino acid limitation, Gcn2 phosphorylates the alpha subunit of translation initiation factor 2 (eIF2 $\alpha$ ).

eIF2 in its GTP-bound form binds initiator methionyl-tRNA<sup>Met</sup> (Met-tRNA<sub>i</sub><sup>Met</sup>) to form the ternary complex that delivers the Met-tRNA<sub>i</sub><sup>Met</sup> to the ribosome during translation initiation [2]. Once the translation start codon has been detected, eIF2 is released in its GDP-bound form. eIF2 needs to be recycled to its eIF2-GTP-bound form by its guanine nucleotide exchange factor (GEF) eIF2B, to be able to form the next ternary complex. eIF2 phosphorylation converts eIF2 from a substrate to an inhibitor of eIF2B, thereby leading to reduced cellular levels of ternary complex. As a consequence, protein synthesis is affected in two ways, reduction in global protein synthesis, and at the same time increased translation of specific mRNAs coding for transcription factors, such as Gcn4 in yeast or ATF4 in mammals [2, 3]. The regulation of *GCN4/ATF4* translation is mediated by upstream open reading frames (uORFs) present in the 5' untranslated region of the mRNA [2]. eIF2 $\alpha$  phosphorylation and concomitant reduction in availability of ternary complexes allows ribosomes to overcome the inhibitory function of the uORFs and instead initiate at the main open reading frame. The resulting increased Gcn4/ATF4 protein levels regulate the transcription of many genes, including the increased transcription of genes coding for amino acid biosynthetic enzymes [2, 4]. In nature, cells usually do not experience such harsh starvation conditions as those imposed in the laboratory, since they start to already respond to the onset of starvation. This means a more modest level of Gcn2 activation, and a more modest increase in eIF2 phosphorylation. Hence, the resulting increased translation of Gcn4/ATF4 is the most critical starvation response rather than the reduction in global protein synthesis [2, 3].

So far, this starvation pathway has been best studied in the yeast *Saccharomyces cerevisiae*. Even when starved for only one amino acid, this pathway induces the expression of enzymes belonging to many amino acid biosynthetic pathways, leading to the *de-novo* synthesis of more than just the missing amino acid. For this reason, in yeast this pathway was called General Amino Acid Control (GAAC).

Gcn2 is absolutely dependent on its effector protein Gcn1 for its activation [5], and it must directly bind to Gcn1, via the N-terminal RWD domain (a domain found in RING finger-containing proteins, WD-repeat-containing proteins, and yeast DEAD (DEXD)-like helicases) in Gcn2 and the RWD binding domain (RWDBD) in Gcn1 [6]. The R2259A substitution in the RWDBD of Gcn1 abolishes Gcn2-binding *in vivo* and *in vitro*, and impairs Gcn2 activation *in vivo*, but does not affect any other known Gcn1 functions [6], suggesting that Arg-2259 is a direct Gcn2 contact point. Since in the cell extract of *gcn1Δ* strains Gcn2 is still enzymatically active, this suggests that Gcn1 is not required for the Gcn2 enzymatic activity *per se*, but that Gcn1 is directly involved in transfer of the starvation signal to Gcn2 [5-7]. Gcn1 [7] and Gcn2 [8] each bind to the ribosome, and this interaction is important for full Gcn2 activation. In addition, in Gcn1 as well as Gcn2, the regions required for ribosome binding do not overlap with those required for direct Gcn1-Gcn2 interaction [6]. This suggests that Gcn1, Gcn2 and the ribosome can form a trimeric complex.

The exact mechanism by which Gcn2 detects starvation is still not fully understood. Currently two models were proposed which do not necessarily exclude each other. In the first working model, Gcn2 and Gcn1 form a trimeric complex with the ribosome [5, 6]. Under starvation conditions, when the cognate charged tRNA is not available, an uncharged tRNA enters the ribosomal A-site in a codon specific manner. This tRNA is then transferred to the Histidyl-tRNA synthesis-like domain of Gcn2, leading to Gcn2 auto-phosphorylation [2]. Activated Gcn2 then phosphorylates its substrate eIF2 $\alpha$ . In a second working model, ribosomal stalk proteins are involved in mediating Gcn2 activation [9-11]. Unavailability of a cognate aminoacylated tRNA allows the ribosomal stalk proteins to interact with Gcn2 to mediate the stimulation of its kinase domain [10]. The link between uncharged tRNAs and the P-stalk remains to be determined in view

of Gcn2 activation under amino acid starvation in yeast and mammals. No matter the mechanism of Gcn2 activation, yeast studies suggest that direct Gcn1-Gcn2 interaction, and the association of Gcn2 and Gcn1 with the ribosome, are required for Gcn2 activation [6, 8, 12]. Supporting the idea that the same is true in mammals, it has recently been shown that deletion of Gcn1 in mice abolishes Gcn2 activation [13]. Gcn2 has been found to also play a crucial role in responding to ribotoxic stress elicited by colliding ribosomes [14].

Gcn2 is also implicated in a large array of other biological processes, such as coping with glucose starvation, cell cycle regulation, neuronal development, the immune system, and memory formation [1]. This implies that Gcn2 must be tightly regulated in order to ensure that it executes the correct function at the correct time, cellular location, and organ. Not surprisingly, Gcn2 has been linked to various diseases and disorders, such as cancer and Alzheimer's disease [1, 15], highlighting the need to better understand the molecular mechanisms underlying Gcn2 regulation. Curiously, it appears that Gcn1 is required for the various Gcn2 functions unrelated to overcoming amino acid starvation [1], underscoring the importance of Gcn1 for Gcn2 function and regulation.

Gcn1 is a large cytoplasmic protein with a molecular mass of 296 kDa with no known enzymatic activity [5]. Only the Gcn1 middle portion has significant homology to another known protein, which is the N-terminus of the fungal translation elongation factor 3 (eEF3) [5]. Computational analyses suggest that Gcn1 consists almost entirely of HEAT repeats [16], and this was supported by the computational model established with high confidence for the RWDBD of Gcn1 [17], as well as by the cryoEM structure of Gcn1 bound to the ribosome [18]. The abbreviation HEAT was derived from proteins in which the repeats were first identified; Huntington, Elongation factor 3, Protein phosphatase 2A and Target of rapamycin [16]. Proteins containing HEAT repeats are usually large and interact with a wide variety of proteins [16]. It appears that HEAT repeat proteins function as scaffold proteins, forming a platform on which signalling molecules can assemble to form a multiprotein complex, thereby allowing the co-ordination of regulation in a temporal as well as spatial manner [19]. Together, this suggests that Gcn1 functions as a scaffold protein to allow the modulation of Gcn2 activity. In fact, a couple of proteins have already been identified that bind to Gcn1.

The first protein discovered to bind to Gcn1 was Gcn20 [20]. Gcn20 is required, but not essential, for Gcn2 activation [7, 21]. Gcn1-ribosome co-sedimentation assays suggest that Gcn20 modulates the affinity of Gcn1 to the ribosome, supporting the idea that Gcn20 fine-tunes Gcn1-ribosome interaction in response to certain non-yet-known conditions, and that way may modulate the level of Gcn1-mediated Gcn2 activation.

Experimental studies revealed that the N-terminal  $\frac{3}{4}$  of Gcn1 (residues 1-2052) is required for ribosome binding, suggesting that Gcn1 contains many weak binding sites that together are strong enough for providing sufficient affinity to the ribosome [6, 12]. Supporting this idea, cryo EM studies showed Gcn1 contacting ribosomal disomes almost throughout its entire length [18]. Since disomes result from a translating ribosome rear-ending a stalled ribosome leading to ribotoxic stress [22], this supports the idea that Gcn1 as well as Gcn2 are involved in responding to ribotoxic stress. So far, the small ribosomal protein Rps10 was shown to directly contact Gcn1, and disruption of this interaction reduces the efficiency of Gcn2 activation [23]. Rps10 may be necessary to keep the functional part of Gcn1 in sufficient proximity to the ribosome to promote efficient Gcn2 activation.

The first and so-far best characterized Gcn2 inhibitor, that is also a Gcn1 binding protein, is Yih1 in yeast (Yeast Impact Homologue 1) and the mammalian counterpart called IMPACT (imprinted with ancient domain) [1]. As found for Gcn2, Yih1/IMPACT contains an N-terminal RWD domain that binds to the Gcn1 RWDBD in an Arg-2259 dependent fashion [24, 25]. This way, Yih1/IMPACT competes with Gcn2 for Gcn1-binding in yeast as well as mammals [24-26]. As a consequence, Gcn1-Gcn2 interaction is reduced, and so is Gcn2 activation. Yih1 as well as IMPACT are located on the ribosome [27, 28], raising the intriguing possibility that Yih1/IMPACT is located in close proximity to Gcn1 and Gcn2 on the ribosome, allowing instant Gcn2 inhibition and reversal of inhibition in a spatiotemporal manner in the cell. Since deletion of *YIH1* does not lead to increased Gcn2 activity, this suggests that Yih1/IMPACT inhibits Gcn2 only under certain

circumstances or in certain locations in the cell [24], or specific organs in an organism such as the hypothalamus [29]. The cue that triggers Yih1/IMPACT to inhibit Gcn2 remains to be uncovered. So far it is only known that actin dynamics affects IMPACT's ability to inhibit Gcn2 [26, 30]. Gir2 in yeast, or DFRP2 in mammals, also contains an N-terminal RWD domain, and so far for Gir2 it has been shown that it inhibits Gcn2 by binding to Gcn1, as found for Yih1/IMPACT [31]. The role of Gir2 is to dampen the Gcn2 response under prolonged stress conditions [32].

Taken together, evidence is accumulating that Gcn1 is a scaffold protein that binds other proteins to allow adjustment of Gcn2 activity - and thus modulation of the GAAC pathway response - to the cell's needs. We interrogated published large-scale interactome studies [33-36], to identify proteins potentially in complex with Gcn1. Among these proteins, Xrn1 was found to be in the same complex as Gcn1 [34, 36]. For that reason, we here aimed to investigate whether Xrn1 is relevant for the functioning of the GAAC pathway. Xrn1 is a 3' → 5' exonuclease that is best known for its involvement in mRNA decay and quality control, as well as translational regulation through modifying the abundance of specific mRNA species via miRNA, siRNA, and lncRNA [37]. We found that cells deleted for *XRNI* were less able to grow under starvation conditions, and this correlated with reduced phosphorylation levels of eIF2 $\alpha$ . Constitutively active Gcn2 is known to cause slow growth due to eIF2 $\alpha$  hyper-phosphorylation, and concomitant impairment of general protein translation [38]. Deletion of *XRNI* did not revert this growth defect, nor did it impair eIF2 $\alpha$  hyper-phosphorylation, suggesting that Xrn1 is not required for the Gcn2 enzymatic function *per se*, nor for the recognition of its substrate eIF2 $\alpha$ . Furthermore, this suggested that *XRNI* deletion did not simply lead to enhanced rates of eIF2 $\alpha$  de-phosphorylation. mEGFP inserted in Xrn1 in-frame after Ser-235 sterically prevents Xrn1-ribosome binding [39], and this Xrn1-mEGFP was still able to complement an *xrn1 $\Delta$*  strain for growth under starvation conditions, suggesting that Xrn1-ribosome interaction is not critical for the GAAC response. Our co-precipitation studies suggest that Xrn1 is in complex with Gcn1 [34, 36], and that Gcn2 is part of this complex as well. Together, our findings suggest that Xrn1 promotes efficient Gcn2 activation, directly or indirectly, and potential mechanisms are laid out in the discussion section.

## Results

### ***XRNI* deletion leads to impaired growth under starvation conditions.**

Considering that for *in vivo* activation, Gcn2 must directly bind to its effector protein Gcn1 [5], and that in interactome studies Xrn1 was found to be potentially in complex with Gcn1 [34, 36], this raised the possibility that Xrn1 contacts Gcn1 to modulate the level of Gcn2 activation. To test this notion, we wanted to investigate whether *XRNI* deletion affects Gcn2 activation *in vivo*. For this, we took advantage of the fact that *in vivo*, Gcn2 activity can be easily scored in semi-quantitative growth assays, where cells are grown in the absence or presence of sulfometuron methyl (SM), a drug causing starvation for branched-chain amino acids [40]. Only cells able to activate Gcn2 can grow in presence of SM. The more Gcn2 activation is hampered, the weaker the growth in presence of SM.

For this growth assay, saturated overnight cultures of wild-type yeast, and isogenic strains deleted for *XRNI* or *GCN2*, were subjected to 10 fold serial dilutions, and aliquots were transferred to solid medium containing SM or not. As expected, wild-type yeast was able to grow in presence of SM, but not a *gcn2Δ* strain (Fig. 1A, left panel). We found that in presence of SM, the growth of *xrn1Δ* strains was impaired as compared to the wild-type strain. Given that in these growth assays the cells had to exit stationary phase while already exposed to SM, this raised the possibility that the observed SM sensitivity (SM<sup>s</sup>) phenotype of *xrn1Δ* strains was due to an impaired ability to re-enter the cell cycle, rather than impaired Gcn2 activation. To test this, we repeated the growth assay but transferred exponentially growing cells onto solid medium. We found that even under these conditions the *xrn1Δ* strain exhibited a SM<sup>s</sup> sensitivity (Fig. 1A, right panel), which is in agreement with the idea that Gcn2 activation was hampered in the *xrn1Δ* strain. The fact that in contrast to the *gcn2Δ* strain, the *xrn1Δ* strain was still able to grow to some extent on the SM medium, this suggested that Xrn1 is not essential for Gcn2 activation, but required for full Gcn2 activation.

### ***XRNI* deletion leads to reduced levels of eIF2α phosphorylation**

Next, we aimed to obtain evidence that the SM<sup>s</sup> phenotype is due to impaired Gcn2 activation, by scoring for the phosphorylation level of eIF2α (eIF2α-P), the substrate of Gcn2. For this, cells were grown to exponential phase in liquid medium, and exposed for 1 h to 1 μg/ml SM before harvesting. Whole cell extracts were generated and subjected to SDS polyacrylamide electrophoresis (SDS-PAGE), and immunoblotting using antibodies against phosphorylated eIF2α (eIF2α-P), and against Pgk1 as a loading control. For quantitative estimation of the level of eIF2α-P, for each sample the signal intensity of eIF2α-P was divided by that of Pgk1, and then normalised by the eIF2α-P/Pgk1 ratio of the unstarved wild-type cells. We found that deletion of *XRNI* led to reduced eIF2α-P levels under amino-acid starved conditions, as compared to that of the wild-type control strain (Fig. 1B, lane 1 vs 3, Fig. 1C), in agreement with the idea that Gcn2 activation was impaired. We observed that *XRNI* deletion also led to reduced eIF2α-P levels under non-starved conditions (Fig. 1B, lane 6 vs 8, Fig. 1C), suggesting that Xrn1 is also required for maintaining the basal level of Gcn2 activity.

We next validated whether the SM<sup>s</sup> was truly due to the intended deletion of *XRNI*, and not due to an ectopic mutation. For this, we first used two plasmids from the yeast genome tiling collection [41], a systematic library consisting of plasmids that each carry ~10 kb fragments of the yeast genome. One plasmid contained the entire *XRNI* gene, while the other contained a truncated version of the gene (Fig. 2A, schematic on the right side). In semi-quantitative growth assays, we found that a plasmid-borne genomic fragment containing full-length *XRNI* complemented the SM<sup>s</sup> phenotype (Fig. 2A, rows 1&2 vs 5), while a genomic fragment harbouring truncated *XRNI* did not (Fig. 2A, rows 1&2 vs 3). In order to provide final evidence that the SM<sup>s</sup> of the *xrn1Δ* strain is truly due to that missing gene, we subcloned a smaller genomic fragment that contained only the intact *XRNI* gene. A subsequent semi-quantitative growth assay revealed that plasmid borne *XRNI* was able to fully restore growth on starvation medium (Fig. 3A). Next, we tested whether the



impaired eIF2 $\alpha$ -P levels of the *xrn1 $\Delta$*  strain was complemented as well. As expected, we found that the plasmid containing the *XRNI* gene was able to restore the eIF2 $\alpha$ -P levels, while empty plasmid (vector) did not (Fig. 3B, lane 12 vs 3&4, Fig. 3C). Taken together, our results suggest that Xrn1 is required for achieving wild-type eIF2 $\alpha$ -P levels under starved as well as non-starved conditions.

### ***In vivo* evidence that Xrn1 is in complex with Gcn1 and Gcn2**

Interactome studies found that Xrn1 and Gcn1 co-precipitate with the same bait proteins [34, 36]. However, none of the interactome studies detected Gcn1 as prey when Xrn1 was used as bait, or *vice versa*. Therefore, we wanted to investigate whether Xrn1 and Gcn1 truly are members of the same protein complex. For this, a co-precipitation assay was performed using a strain expressing GFP-tagged Xrn1 from its own promoter and from its endogenous chromosomal location [42]. Cells were grown to exponential phase, cell extract generated, and then subjected to GFP-antibody mediated immunoprecipitation. The precipitates were resolved via SDS-PAGE, and then subjected to Western blotting using antibodies against the GFP tag, Gcn1, Gcn2, Gcn20, and Pgk1. We reproducibly found (3 independent experiments) that the immuno-precipitates from the *XRNI-GFP* strain showed a stronger signal for Gcn1 and Gcn2 as compared to the untagged control strain or the *PGK1-GFP* control strain (Fig. 4, lanes 7 vs 5&6), suggesting that Xrn1 is in complex not only with Gcn1, but also with Gcn2. Gcn20 was not reproducibly found in the Xrn1-GFP precipitate, suggesting that if Gcn20 is part of the complex it is only weakly bound. Pgk1 is a highly abundant housekeeping gene not known to bind to Gcn1 or Gcn2. Even after a long exposure, Pgk1 was not detectable in the immuno-precipitates from the wild-type strain (Fig. 4, lane 5), nor was Pgk1 detectable in the Xrn1-GFP or Gcn20-GFP precipitates (Fig. 4, lanes 7&8), suggesting that in our procedure un-specifically bound proteins were efficiently removed. Thus, our findings support the idea that Xrn1 specifically co-precipitates Gcn1 and Gcn2, suggesting that Xrn1, Gcn1 and Gcn2 reside in the same protein complex.

### **Evidence that *XRNI* deletion affects the GAAC response upstream of Gcn4 translational regulation.**

If the SM<sup>s</sup> phenotype of the *xrn1 $\Delta$*  strain is truly due to reduced eIF2 $\alpha$ -P levels, and concomitant reduced translational depression of Gcn4, then constitutively increased *GCN4* translation should revert the SM<sup>s</sup> phenotype. To test this, we introduced into the *xrn1 $\Delta$*  strain, and into the isogenic wild-type strain as control, a plasmid harbouring *GCN4* under its own promoter but lacking the inhibitory uORFs in its 5' mRNA untranslated region (dubbed *GCN4<sup>c</sup>*). This well-characterised plasmid leads to the constitutive high abundance of Gcn4 in the cell [43]. In subsequent semi-quantitative growth assays, under non-starved conditions, deletion of *XRNI* led to a growth defect (Fig. 5A, control plate, rows 5,6 vs 7,8) as reported previously [44]. While *Gcn4<sup>c</sup>* did not affect the growth rate of the wild-type strain (Fig. 5A, control plate, rows 7,8 vs 1,2), *GCN4<sup>c</sup>* exacerbated the growth defect of the *xrn1 $\Delta$*  strain (Fig. 5A, control plate, rows 3,4 vs 5,6). In contrast to that, under starved conditions, *Gcn4<sup>c</sup>* improved the growth of the *xrn1 $\Delta$*  strain (Fig. 5A, SM plates, rows 3,4 vs 5,6). Next, we quantitatively evaluated the growth rates of each strain on starvation medium, relative to that on the control plates. This allowed us to take into account the growth differences of strains on the control plate (non-starved conditions), i.e. to take into account growth differences not caused by SM. This permitted a more objective evaluation on the severity of the SM<sup>s</sup> phenotype (Fig. 5B). The data suggested that, on starvation medium, *Gcn4<sup>c</sup>* enhanced the growth rate of the wild-type strain slightly, though this difference was not statistically significant (Fig. 5A, rows 1&2 vs 7&8; Fig. 5B, compare the bottom and top bars). In contrast to that, *Gcn4<sup>c</sup>* almost doubled the growth rate of the *xrn1 $\Delta$*  strain on starvation medium (Fig. 5A, rows 5&6 vs 3&4; Fig. 5B, compare the two middle bars). In fact, when normalising for the growth defect on the control plates, the growth rate of the *xrn1 $\Delta$*  strain harbouring *Gcn4<sup>c</sup>* was not statistically different to that of the wild-type strain containing vector alone or *Gcn4<sup>c</sup>* (Fig. 5B, compare the top two bars and the bottom bar). It shall be noted that these conclusions were made under the assumption that *Gcn4<sup>c</sup>* led to the same high Gcn4 protein levels in wild-type and *xrn1 $\Delta$*  strains. Nevertheless, the findings suggested

that the SM<sup>s</sup> phenotype of the *xrn1Δ* strain can be suppressed by overexpression of Gcn4, in agreement with the idea that removal of *XRN1* leads to a defect upstream of Gcn4 translational regulation.

### ***XRN1* deletion does not revert the *slg<sup>-</sup>* phenotype elicited by constitutively active Gcn2**

Reduced eIF2α-P levels could be the result of impaired Gcn2 activation, or the result of increased activity of protein phosphatase 1 (PP1, encoded by *GLC7*) de-phosphorylating eIF2α-P [45]. In order to test whether the PP1 activity was enhanced in *xrn1Δ* strains, we took advantage of mutations that render Gcn2 constitutively active.

The Gcn2 E803V substitution renders Gcn2 constitutively active [38], but this Gcn2 variant (dubbed Gcn2<sup>c</sup>) still requires Gcn1 to become constitutively active [46, 47]. Activated Gcn2<sup>c</sup> leads to eIF2α hyper-phosphorylation, thereby dramatically impacting on global protein synthesis, and consequently leading to a growth defect even under non-starved conditions. Thus, this slow growth (*slg<sup>-</sup>*) phenotype is indicative of Gcn2 hyper-activity. Since Gcn2<sup>c</sup> only requires to be activated once for its consequent permanent activation, we reasoned that if Xrn1 impairs - but not fully blocks - Gcn1-mediated Gcn2 activation, then the activity of Gcn2<sup>c</sup> should hardly be affected in an *xrn1Δ* strain. However, if *XRN1* deletion leads to enhanced PP1 activity, this should counteract Gcn2<sup>c</sup> mediated eIF2α hyper-phosphorylation, visible by the reversion of the *slg<sup>-</sup>* phenotype.

To test this, we conducted semi-quantitative growth assays using the WT strain BY4741 and isogenic strains deleted for *GCN1*, *GCN3* and *XRN1*, respectively, that each contained vector alone or a plasmid expressing Gcn2<sup>c</sup> from a galactose inducible promotor. As expected, the growth defect elicited by Gcn2<sup>c</sup> was apparent in the WT strain but not in the *gcn1Δ* strain (Fig. 6A, row 2 vs 1, row 5 vs 4). In a *gcn3Δ* strain eIF2α-P is unable to inhibit its GEF exchange factor eIF2B [2], meaning that eIF2α-P is unable to hamper protein synthesis despite of its hyper-phosphorylation. Accordingly, as expected, Gcn2<sup>c</sup> was unable to cause a *slg<sup>-</sup>* phenotype in the *gcn3Δ* strain (Fig. 6A, row 14 vs 13). In the *xrn1Δ* strain, we found that Gcn2<sup>c</sup> still elicited a growth defect that was comparable to that of the WT strain (Fig. 6A, row 8 vs 7, 11 vs 10, 2 vs 1). This is in agreement with the idea that *XRN1* deletion does not lead to enhanced PP1 activity.

A fragment encompassing the Gcn2 protein kinase domain (amino acids 591-1010), and harbouring the R794G;F842L double substitution, is constitutively active [48]. The mutations bypass the requirement of Gcn1 for this protein kinase domain to become constitutively active [48], and therefore this constitutive Gcn2 fragment is dubbed Gcn2<sup>hyper</sup>. As expected, in a *gcn1Δ* strain, Gcn2<sup>hyper</sup> elicits a *slg<sup>-</sup>* phenotype in contrast to Gcn2<sup>c</sup> (Fig. 6A, rows 6 vs 5 vs 4), while in a *gcn3Δ* strain Gcn2<sup>hyper</sup> did not elicit a *slg<sup>-</sup>* phenotype (Fig. 6A, rows 15 vs 14 vs 13). We found that Gcn2<sup>hyper</sup> caused a growth defect in the *xrn1Δ* strain, as found for the WT and *gcn1Δ* strain (Fig. 6A, rows 9 vs 7, 12 vs 10, 3 vs 1, 6 vs 4).

As a control, we repeated the experiment but used the Gcn2 wild-type version. Gcn2<sup>WT</sup> needs a signalling cue such as amino acid starvation to become activated. As expected, on medium containing galactose no growth defect can be observed (Fig. 6A, rows 16-21), given that under these conditions Gcn2 is overexpressed but has not been activated.

In order to test whether the observed impaired growth was truly due to hyperactive Gcn2, we scored for the levels of eIF2α phosphorylation. Experimental procedures require exponentially growing cells for scoring eIF2α phosphorylation levels. However, constitutively active Gcn2 elicits a growth defect, and Gcn2<sup>hyper</sup> barely allows any growth. For that reason, we grew cells first to exponential phase (to an OD of 0.4, for ~15 hrs) in medium containing 2% raffinose (w/v) as carbon source, before adding galactose (2% w/v final) to induce expression of Gcn2<sup>c</sup> and Gcn2<sup>hyper</sup>. Raffinose was used as - in contrast to glucose - it does not prevent galactose-mediated promotor induction. We found that growth for 3.5 hrs in galactose medium already led to eIF2α-P levels in strains expressing Gcn2<sup>c</sup> (Fig. 6B). Therefore, for our experiments we chose to expose cells for 6 hrs to galactose before harvesting. As expected, we found that in the wild-type strain Gcn2<sup>c</sup> led to increased eIF2α-P levels, and Gcn2<sup>hyper</sup> led to even higher levels (Fig. 6C, lane 1 vs 2 vs 3, Fig. 6E).



Also, as expected, in the *gcn1Δ* strain only Gcn2<sup>hyper</sup> elicited high eIF2α-P levels (Fig. 6C, lane 6 vs 1, Fig. 6E), while Gcn2<sup>c</sup> lead to eIF2α-P levels that were similar to the basal eIF2α-P levels in the wild-type strain (Fig. 6C, lane 5 vs 1, Fig. 6E). In *xrn1Δ* strains Gcn2<sup>c</sup> and Gcn2<sup>hyper</sup> elicited increased eIF2α-P levels comparable to those in the wild-type (Fig. 6C, lane 8 vs 2, lane 9 vs 3; Fig. 6E). This suggests that the observed impaired growth was truly due to enhanced eIF2α-P phosphorylation.

Taken together, these findings are in agreement with the idea that in an *xrn1Δ* strain the reduced eIF2α-P levels are not due to enhanced PP1 activity, and that Xrn1 is required for full or efficient Gcn2 activation, directly or indirectly.

### **Xrn1-ribosome interaction is not required for growth on starvation medium.**

Xrn1 binds to ribosomes [39], raising the question whether this interaction is required for promoting full Gcn2 activation. To test this, we used a strain that expresses from its native chromosomal location an Xrn1 protein incapable of ribosome-binding [39]. This was achieved by an in-frame insertion of the monomeric enhanced green fluorescent protein (mEGFP) into XRN1 (after Ser-235), which sterically hinders the interaction of Xrn1 with the ribosome [39]. Strains containing Xrn1-mEGFP did not show a growth defect as found for a *xrn1* deletion strain (Fig. 7, left panel, rows 2&3 vs 6&7), but instead grew as well as the wild-type strain (Fig. 7, left panel, rows 2&3 vs 1&8), suggesting that the mEGFP insertion did not affect Xrn1 function, at least not to a large extent [39], and that Xrn1-mEGFP was sufficiently expressed. We found that on SM media, the strain harbouring Xrn1-mEGFP grew as well as the strain containing endogenous wild-type Xrn1, or C-terminally GFP-tagged Xrn1 (Fig. 7, right panel, rows 2&3 vs 1&8 vs 4&5). This suggested that Xrn1-ribosome interaction is not necessary for mediating efficient Gcn2 activation.

### **The Xrn1 3'→5' exonuclease activity is required for growth on starvation medium.**

In order to test whether the Xrn1 enzymatic activity is required for conferring growth on starvation medium, we generated plasmid-borne *XRN1* expressed from its native promotor and harbouring a triple-myc tag at its C-terminus, and Xrn1 carrying amino acid substitutions known to be essential for 3'→5' exonuclease activity [49]. These D206A and D208A substitutions, singly or in combination, have been shown previously to abolish enzymatic activity [49]. The triple-myc tagged Xrn1 was able to fully suppress the growth defect of an *xrn1Δ* strain, as well as fully restore growth on starvation medium, suggesting that the triple-myc tag did not affect Xrn1 function (Fig. 8A, rows 1,2 vs 6,7 vs 8). The mutated Xrn1 proteins were expressed at least as well as wild-type Xrn1 (Fig. 8B,C). Yet, on starvation plates *xrn1Δ* strains containing mutated Xrn1 clearly displayed a SM<sup>s</sup> phenotype (Fig. 8A, rows 3-4 vs 1&2). This suggests that the Xrn1 3'→5' exonuclease activity is required for conferring full growth on starvation medium.

## Discussion

The GAAC pathway is best known for its relevance in coping with and overcoming amino acid starvation. In this pathway, Gcn2 senses amino acid availability [1, 2]. For this, Gcn2 must directly bind to its effector protein Gcn1. Gcn1 belongs to the family of HEAT repeat proteins. Since some of these HEAT repeat proteins have been reported to be scaffold proteins [16, 19], this raises the intriguing possibility that Gcn1 is a hub for other proteins to bind and modulate Gcn2 activity according to the cell's needs. In fact, in interactome studies many proteins have been found that are potentially in complex with Gcn1 [33-36]. In these studies, Xrn1 was reported to co-precipitate along with Gcn1 with the same bait proteins [34, 36]. We here have shown that GFP-tagged Xrn1 co-precipitated Gcn1 *in vivo* as well as Gcn2, raising the possibility that all three proteins, Gcn1, Gcn2 and Xrn1, can reside in the same complex. Supporting this idea, Gcn1 and Gcn2 directly interact with each other [6]. In contrast to Gcn1, the large-scale interactome studies did not detect Gcn2 in Xrn1 containing complexes, possibly because Gcn2 is hard to detect due to its low abundance, or because the relevant protein-protein interactions were too weak to sustain the experimental procedures used in these interactome studies.

Gcn1 and Gcn2 directly contact each other [6], and each can associate with ribosomes [1, 2] as found for Xrn1 [39], raising the possibility that Xrn1-Gcn1 and/or Xrn1-Gcn2 interaction was bridged by the ribosome. Though, given the size of the ribosome, it seems unlikely that standard immunoprecipitation protocols could precipitate ribosomes. Nevertheless, our studies do suggest that Gcn1, Gcn2, and Xrn1 reside in the same complex.

In this study, we have obtained several lines of evidence that Xrn1 is required for full Gcn2 activation. A *xrn1Δ* strain showed reduced ability to grow on starvation medium. This correlated with reduced levels of phosphorylated eIF2 $\alpha$  (eIF2 $\alpha$ -P), in agreement with the idea that Gcn2 activation was impaired. In an alternative scenario, the removal of Xrn1 may have stimulated the phosphatase PP1, leading to enhanced rates of eIF2 $\alpha$ -P dephosphorylation. Though, thus far no link between Xrn1 and phosphatases has been reported. Also, we here have found that constitutively active Gcn2 elicited a growth defect that was not reverted by the removal of Xrn1, nor was the eIF2 $\alpha$  hyper-phosphorylation dampened, which would argue against a scenario involving enhanced eIF2 $\alpha$ -P dephosphorylation.

Increased eIF2 $\alpha$ -P levels are required to initiate the next step in the GAAC signalling pathway, which is the enhanced translation of the *GCN4* mRNA. In agreement with the idea that *XRNI* deletion impairs the GAAC at the level of eIF2 $\alpha$ /eIF2 $\alpha$ -P, we found that constitutively translated *GCN4* (Gcn4<sup>c</sup>) rescued the SM<sup>s</sup> phenotype of a *xrn1Δ* strain.

Gcn4<sup>c</sup> did not rescue the *slg<sup>-</sup>* phenotype associated with the deletion of *XRNI*, but instead seemed to have exacerbated this growth defect. While Gcn4 is a transcriptional regulator determining the rate of transcription of specific genes [2], Xrn1 is involved in mRNA decay and quality control, as well as translational regulation through modifying the abundance of specific mRNA species via miRNA, siRNA, and lncRNA [37]. Hence, the exacerbation effect may have been due to certain mRNAs being targeted by both Gcn4 and Xrn1. Further studies would be necessary to investigate which mRNAs are affected by both Gcn4 and Xrn1, and may help reveal new links/crosstalks between the GAAC pathway and Xrn1 mediated processes.

While Gcn1-ribosome and Gcn2-ribosome interaction are each necessary for Gcn2 activation [6-8], our findings seem to indicate that Xrn1-ribosome interaction is not required for promoting Gcn2 activation. It will be interesting to determine whether direct Xrn1-Gcn1 or Xrn1-Gcn2 interaction is necessary for promoting Gcn2 activation. Since Xrn1 plays a role in resolving stalled ribosomes [22], and since a link has been reported between Gcn2 and ribotoxic stress [14], it will be interesting to investigate whether the Xrn1/Gcn1 axis is relevant for resolving stalled ribosomes and/or the ribotoxic stress pathway.

Xrn1's function in mRNA decay and quality control requires its exonuclease activity. Our findings suggest that the Xrn1 exonuclease activity is also required to promote full Gcn2 activation. Given that the recognition of the starvation signal and the concomitant increase in eIF2 $\alpha$  phosphorylation involves proteins already present in the cell (Gcn1, Gcn2, eIF2), how can Gcn2 activation be promoted by Xrn1's function in mRNA decay and quality control?

In one scenario, efficient Gcn1-mediated Gcn2 activation could require the Xrn1 protein to be in close proximity to Gcn1 and Gcn2. Supporting this idea, Xrn1 is physically in the same protein complex as Gcn1 and Gcn2. Xrn1 may be required for promoting the proper orientation of Gcn1 and Gcn2 on the ribosome, in order to ensure that Gcn2 has access to the starvation signal and/or to its substrate eIF2 $\alpha$ . While Xrn1-ribosome interaction is not required for promoting full Gcn2 activation, it is still possible that Xrn1 exerts its role via Xrn1-Gcn1 and/or Gcn1-Gcn2 interaction.

In a second scenario, *XRN1* deletion may have led to reduced levels of proteins relevant for eIF2 $\alpha$  phosphorylation, such as the proteins Gcn1 and Gcn2. This may be due to enhanced protein degradation, reduced translation *per se*, or due to decreased *GCN1* or *GCN2* mRNA levels. However, *XRN1* deletion has not been reported yet to promote protein degradation. *XRN1* deletion has been reported to affect the levels of specific mRNAs [50], however, Xrn1 is involved in mRNA decay [51], as well as miRNA, siRNA and lncRNA-mediated gene repression [37] aimed to dampen the translation of specific mRNAs. This would mean that *XRN1* deletion would lead to increased - rather than decreased - mRNA levels or mRNA translation. Supporting this notion, past studies suggest that Gcn2 and Gcn1 mRNA levels are not increased in *xrn1 $\Delta$*  strains [50]. Also, here we have not found any indication for reduced Gcn1 or Gcn2 levels in *xrn1 $\Delta$*  strains (Fig. 9).

A third scenario is based on the fact that Xrn1 is involved in tRNA quality control [37]. Aberrant tRNAs may accumulate in an *xrn1 $\Delta$*  strain, though one would expect that these would enhance Gcn2 activation as long as they can be detected by Gcn2.

A fourth scenario is based on the fact that Xrn1 is relevant for the processing and maturation of rRNA and thus ribosome biogenesis [37]. In *xrn1 $\Delta$*  strains Gcn1 and Gcn2 may be unable to properly contact the resulting 'faulty' ribosomes. This could hamper the efficient detection of the starvation signal, and dampen Gcn2 activation.

The fifth scenario is based on the fact that Xrn1 has been reported to have an additional biological role that is unrelated to its role in RNA metabolism, which is its function in meiosis [49]. This raises the possibility that Xrn1 may have more not-yet-discovered non-canonical functions, and one of these could be the modulation of Gcn2 activation.

Finally, we cannot exclude the possibility that Xrn1's actions in the cell very indirectly affect the level of Gcn2 activation. Nevertheless, no matter how indirect, Xrn1 deletion hampering Gcn2 activation could be a physiologically relevant mechanism for finetuning Gcn2 activity to the cell's needs.

In this work, we have provided evidence that Xrn1 is required for the full activity of Gcn2, directly or indirectly. This suggests a potential new link between RNA metabolism and the GAAC signalling pathway. While it is not known yet whether its presence in the Gcn1/Gcn2 complex is relevant for promoting GAAC activity, our studies do suggest that Xrn1-ribosome interaction is not required for mediating full Gcn2 activation. It is tempting to speculate that through regulation of the Xrn1 exonuclease activity, and/or through Xrn1 shuttling in or out of the Gcn1/Gcn2 complex, the cell controls the threshold level for GAAC stimulation and/or the intensity of the GAAC response. Xrn1-mediated adjustment of the GAAC may occur in response to environmental or internal stimuli, such as the level of aberrant RNAs. In fact, studies suggest that Xrn1 activity can be regulated in response to cues, e.g. via sequestration to the eisosome under conditions of glucose deprivation, or through the accumulation of aberrant metabolic intermediates [37, 52]. These intriguing possibilities warrant subsequent in-depth studies to unravel the mechanism by which Xrn1 promotes full eIF2 $\alpha$ -P levels in the cell, and whether Xrn1 association with the Gcn1/Gcn2 complex is required for regulating the GAAC.

## Materials and Methods

### Yeast strains and plasmids

Yeast strains and plasmids used in this study are listed in Table I and II. Empty vectors used were pEMBLyex4 [53], pRS316 [54], pRS425 [55], and YCp50 [56].

Plasmid pRS1 harbouring *Xrn1* under its own promoter was constructed by digesting plasmid YGPM33c11 (Dharmacon) with *XhoI* and *XbaI*, and inserting the resulting 6.6 kb long DNA fragment into the similarly digested plasmid pRS316.

In plasmid pRS1, the *NotI* site in the multiple cloning site was removed (GCGGCCGC was replaced by GCGGCCaC) commercially (Genscript, USA), yielding pRS1001. Then - just upstream of the *XRNI* stop codon - the sequence GCG GCC GCA TTG ggt ggt gga GAA GAA CAA AAG TTG ATT TCT GAA GAA GAC TTG ggt ggt gga ggt ggt GAA CAA AAG TTG ATT TCT GAA GAA GAC TTG ggt ggt gga ggt ggt GAA CAA AAG TTG ATT TCT GAA GAA GAC TTG TTG AGA AAG AGA GCG GCC GCT was added commercially, which codes for a 3x myc tag flanked by *NotI* sites (Genscript, USA), yielding pRA1002. In pRS1002 the D206 and D208 substitutions, singly and in combination, were introduced commercially via site-directed mutagenesis (Genscript, USA) resulting into pRA1003, pRA1004, pRA1005, respectively.

### Yeast culture conditions

Cultures were grown in YPD media or in synthetic dextrose media containing the appropriate supplements to cover auxotrophies. To induce expression of genes driven by the galactose inducible promoter, 2% (w/v) galactose was used as carbon source instead of 2% (w/v) glucose. When grown in liquid media, cultures were shaken at 160 rpm. Solid medium contained 2 % agar. All *Saccharomyces cerevisiae* cultures were grown at 30°C unless stated otherwise.

For semi-quantitative growth assays, yeast liquid overnight cultures were subjected to four 10 fold serial dilutions using synthetic dextrose medium lacking supplements and a carbon source. Then, 5 µL of the overnight cultures and of the dilutions were transferred to solid medium. The plates were incubated at 30°C, and the growth documented using a conventional document scanner. When strains showed growth differences on control plates - making it more difficult to determine the effect of SM on cell growth - the growth on SM plates was evaluated quantitatively as published previously [57]. Briefly, for each strain on a plate, for each of the five dilutions a growth score was given from 0 to 10, with score 10 being full growth. Then, for each plate and strain, the sum of the five growth scores was determined, resulting in the overall growth score. For each strain, the overall growth score on the starvation plate was divided by that of the same strains growing on the control plate. The resulting adjusted growth score was divided by that of the wild-type strain expressing GST alone, leading to the relative growth rate. Relative growth rates were then plotted in a bar graph along with the standard error.

### Generating cell pellets from exponentially growing yeast cells

For western blotting assays, cells were grown and harvested as published previously [58]. Briefly, a 250 ml flask containing 50 ml medium was inoculated with a fresh yeast overnight culture and incubated at 160 rpm and 30°C. At OD<sub>600nm</sub> between 0.9 and 1, the cells were subjected to formaldehyde treatment for 1 h (final concentration 1%), and then centrifuged at 2,000 xg for 3 minutes. Cell pellets were immediately stored at -80°C.

For co-precipitation assays, a 1 L indented flask containing 300 ml of liquid medium was inoculated with a fresh yeast overnight culture and incubated at 160 rpm and 30°C. At OD<sub>600nm</sub> = 1-1.5, the cells were pelleted by centrifugation at 2,000 g for 5 min at 4°C, the pellet re-suspended with 5 ml of ice-cold breaking buffer (BB, 30 mM HEPES-KOH, pH 7.4, 50 mM KCl, 10% glycerol) containing protease inhibitors (1 mM PMSF, 10 µg/ml Pepstatin, 1 µg/ml Aprotinin, 1 µg/ml Leupeptin and 5 mM β-mercaptoethanol), transferred to a 13 ml round bottom tube, and then re-pelleted by centrifugation at 2,000 g for 5 min at 4°C. The pellets were immediately frozen at -80°C.



## Generating whole cell extracts

For western blotting, cells were lysed using sodium hydroxide, as published previously [58]. Briefly, cell pellets were resuspended in sodium hydroxide solution, and the cells pelleted again to remove the solution. The pellet was then resuspended in 2x protein loading buffer (0.1% (w/v) bromophenol blue, 4% (w/v) SDS, 100 mM Tris-Cl (pH 6.8), 20% (v/v) glycerol and 1.47 M beta-mercaptoethanol), and subjected to heat treatment at 80°C to fully dissolve the pellet.

For co-precipitation assays, one pellet volume of ice-cold BB containing protease inhibitors (see above) and one pellet volume of acid washed glass beads were added to the cell pellet. The samples were subjected to vortexing ten times at high speed for 30 seconds, alternating with 30 seconds intervals in an ice-water mix, as described earlier [58, 59]. The cell debris was removed by centrifugation at 2,000 g for 5 min at 4°C, the supernatant transferred to a 1.5 ml tube, followed by a spin at 19,000 g for 10 min at 4°C. The supernatant was collected in fresh tubes and the protein concentration determined using the Bradford protein estimation method [60].

## Co-immunoprecipitation assays

Whole cell extracts (1 mg) were incubated with 20 µl (100% bed volume) of protein A resin (Sigma-Aldrich), in a total volume of 480 µl, for 1 h at 4°C. The samples were then centrifuged at 100 g for 1 min at 4°C, and 440 µl of the supernatant was transferred to a fresh tube. Then, 400 µl of the supernatant was transferred to a tube containing 20 µl bed volume of anti-GFP antibodies covalently linked to sepharose beads (Abcam, #ab69314, coated with 5% BSA prior to usage), and incubated for 2 hrs at 4°C. After centrifugation at 100 g for 3 min at 4°C, the supernatant was removed and the beads were washed six times with 400 µl of BB. The beads were suspended in 2x protein loading buffer, heated at 95°C for 15 min, and 15 µl of each sample was resolved in denaturing SDS polyacrylamide 4%–17% gradient gels. In addition, 10% of the input was separated on the same gel.

## Protein techniques

Proteins were separated by SDS-polyacrylamide electrophoresis (SDS-PAGE) using 4%–17% gradient gels, and transferred to PVDF membranes (Pierce) according to the manufacturer's protocol. Proteins on the membranes were visualized via PonceauS staining (0.1% w/v, in 5% acetic acid) for 20 min, followed by destaining in 5% acetic acid. Specific proteins were detected using primary antibodies against Gcn1 (1:1,000, HL1405, [20]), Gcn2 (1:1,000, [61]), Gcn20 (1:1,000, CV1317, [20]), eIF2α-P (1:1,000, # 44-728G, Invitrogen), Pgk1 (1:5,000, # 459250, Invitrogen), myc (1:500, # 11667203001, Roche Applied Science), FLAG (1:500, #F3165, Sigma), and GFP (1:1,000, # sc-8334, Santa Cruz). Immune complexes were then visualized using the Super-signal Chemiluminescence detection substrate (Pierce), and horseradish peroxidase conjugated to donkey anti-rabbit antibodies (#31458, Invitrogen, for the detection of Gcn1, Gcn2, Gcn20, eIF2α-P, and GFP antibodies), conjugated to goat anti-mouse antibodies (#31430, Thermo, for detection of Pgk1 and myc antibodies), conjugated to goat anti-guinea pig antibodies (#A18769, Thermo, for detection of Gcn2), and the LAS4000 chemiluminescence imaging system.

## Acknowledgements

We thank Alain Jacquier for the yeast strain containing Xrn1-mEGFP.

## Funding

This work was supported by The Marsden Fund Council from Government funding, administered by the Royal Society of New Zealand (MAU0607), Auckland Medical Research Foundation (4113010), and Massey University Strategic Research Excellence Fund (RM20783). RS was supported by the Massey University Doctoral Scholarship, and RAA by the Massey University Māori Doctoral Scholarship.



590  
591  
592  
593  
594  
595  
596  
597  
598

**Data sharing**

Data sharing is not applicable to the paper, since all data are included within the main article.

**Author contributions**

ES conceived the idea and attracted funding for the research. RS, RA, AHS, ES were involved in experimental design, execution and interpretation of results, ES drafted the manuscript with contributions from AHS, RA and RS.

## References

- Castilho BA, Shanmugam R, Silva RC, Ramesh R, Himme BM, Sattlegger E. Keeping the eIF2 alpha kinase Gcn2 in check. *Biochimica et Biophysica Acta (BBA)-Molecular Cell Research*. 2014;1843(9):1948-68. DOI: [10.1016/j.bbamcr.2014.04.006](https://doi.org/10.1016/j.bbamcr.2014.04.006)
- Hinnebusch AG. Translational regulation of GCN4 and the general amino acid control of yeast. *Annu Rev Microbiol*. 2005;59:407-50. DOI: [10.1146/annurev.micro.59.031805.133833](https://doi.org/10.1146/annurev.micro.59.031805.133833)
- Dever TE. Gene-specific regulation by general translation factors. *Cell*. 2002;108(4):545-56. DOI: [10.1016/s0092-8674\(02\)00642-6](https://doi.org/10.1016/s0092-8674(02)00642-6)
- Chaveroux C, Lambert-Langlais S, Cherasse Y, Averous J, Parry L, Carraro V, et al. Molecular mechanisms involved in the adaptation to amino acid limitation in mammals. *Biochimie*. 2010;92(7):736-45. DOI: [10.1016/j.biochi.2010.02.020](https://doi.org/10.1016/j.biochi.2010.02.020)
- Marton MJ, Crouch D, Hinnebusch AG. GCN1, a translational activator of GCN4 in *S. cerevisiae*, is required for phosphorylation of eukaryotic translation initiation factor 2 by protein kinase GCN2. *Mol Cell Biol*. 1993;13:3541-56. DOI: [10.1128/mcb.13.6.3541-3556.1993](https://doi.org/10.1128/mcb.13.6.3541-3556.1993)
- Sattlegger E, Hinnebusch AG. Separate domains in GCN1 for binding protein kinase GCN2 and ribosomes are required for GCN2 activation in amino acid-starved cells. *EMBO J*. 2000;19(23):6622-33. doi: 10.1093/emboj/19.23.6622. PubMed PMID: ISI:000165763800034. DOI: [10.1093/emboj/19.23.6622](https://doi.org/10.1093/emboj/19.23.6622)
- Marton MJ, Vazquez De Aldana CR, Qiu H, Chakraborty K, Hinnebusch AG. Evidence that GCN1 and GCN20, translational regulators of GCN4, function on elongating ribosomes in activation of eIF2alpha kinase GCN2. *Molecular and Cellular Biology*. 1997;17(8):4474-89. DOI: [10.1128/MCB.17.8.4474](https://doi.org/10.1128/MCB.17.8.4474)
- Ramirez M, Wek RC, Hinnebusch AG. Ribosome association of GCN2 protein kinase, a translational activator of the GCN4 gene of *Saccharomyces cerevisiae*. *Molecular and cellular biology*. 1991;11(6):3027-36. DOI: [10.1128/mcb.11.6.3027-3036.1991](https://doi.org/10.1128/mcb.11.6.3027-3036.1991)
- Inglis AJ, Masson GR, Shao S, Perisic O, McLaughlin SH, Hegde RS, et al. Activation of GCN2 by the ribosomal P-stalk. *Proceedings of the National Academy of Sciences*. 2019;116(11):4946-54. DOI: [10.1073/pnas.1813352116](https://doi.org/10.1073/pnas.1813352116)
- Harding HP, Ordonez A, Allen F, Parts L, Inglis AJ, Williams RL, et al. The ribosomal P-stalk couples amino acid starvation to GCN2 activation in mammalian cells. *Elife*. 2019;8:e50149. DOI: [10.7554/eLife.50149](https://doi.org/10.7554/eLife.50149)
- Jiménez-Díaz A, Remacha M, Ballesta JP, Berlanga JJ. Phosphorylation of initiation factor eIF2 in response to stress conditions is mediated by acidic ribosomal P1/P2 proteins in *Saccharomyces cerevisiae*. *PLoS One*. 2013;8(12):e84219. DOI: [10.1371/journal.pone.0084219](https://doi.org/10.1371/journal.pone.0084219)
- Sattlegger E, Hinnebusch AG. Polyribosome binding by GCN1 is required for full activation of eIF2a kinase GCN2 during amino acid starvation. *J Biol Chem*. 2005;280(16):16514-21. doi: 10.1074/jbc.M414566200. PubMed PMID: ISI:000228444800126. DOI: [10.1074/jbc.M414566200](https://doi.org/10.1074/jbc.M414566200)
- Yamazaki H, Kasai S, Mimura J, Ye P, Inose-Maruyama A, Tanji K, et al. Ribosome binding protein GCN1 regulates the cell cycle and cell proliferation and is essential for the embryonic development of mice. *PLoS genetics*. 2020;16(4):e1008693. DOI: [10.1371/journal.pgen.1008693](https://doi.org/10.1371/journal.pgen.1008693)
- Wu CC-C, Peterson A, Zinshteyn B, Regot S, Green R. Ribosome collisions trigger general stress responses to regulate cell fate. *Cell*. 2020;182(2):404-16. e14. DOI: [10.1016/j.cell.2020.06.006](https://doi.org/10.1016/j.cell.2020.06.006)

15. Yashin AI, Wu D, Arbeev K, Bagley O, Akushevich I, Duan M, et al. Interplay between stress-related genes may influence Alzheimer's disease development: the results of genetic interaction analyses of human data. *Mechanisms of Ageing and Development*. 2021;196:111477. DOI: [10.1016/j.mad.2021.111477](https://doi.org/10.1016/j.mad.2021.111477)
16. Andrade MA, Petosa C, O'Donoghue SI, MuÈller CW, Bork P. Comparison of ARM and HEAT protein repeats. *Journal of molecular biology*. 2001;309(1):1-18. DOI: [10.1006/jmbi.2001.4624](https://doi.org/10.1006/jmbi.2001.4624)
17. Rakesh R, Krishnan R, Sattlegger E, Srinivasan N. Recognition of a structural domain (RWDBD) in Gcn1 proteins that interacts with the RWD domain containing proteins. *Biology direct*. 2017;12(1):12. DOI: [10.1186/s13062-017-0184-3](https://doi.org/10.1186/s13062-017-0184-3)
18. Pochopien AA, Beckert B, Kasvandik S, Berninghausen O, Beckmann R, Tenson T, et al. Structure of Gcn1 bound to stalled and colliding 80S ribosomes. *Proceedings of the National Academy of Sciences*. 2021;118(14). DOI: [10.1073/pnas.2022756118](https://doi.org/10.1073/pnas.2022756118)
19. Good MC, Zalatan JG, Lim WA. Scaffold proteins: hubs for controlling the flow of cellular information. *Science*. 2011;332(6030):680-6. DOI: [10.1126/science.1198701](https://doi.org/10.1126/science.1198701)
20. Vazquez de Aldana CR, Marton MJ, Hinnebusch AG. GCN20, a novel ATP binding cassette protein, and GCN1 reside in a complex that mediates activation of the eIF-2 $\alpha$  kinase GCN2 in amino acid-starved cells. *EMBO J*. 1995;14:3184-99. DOI: [10.1002/j.1460-2075.1995.tb07321.x](https://doi.org/10.1002/j.1460-2075.1995.tb07321.x)
21. deAldana CRV, Marton MJ, Hinnebusch AG. Gcn20, a novel ATP binding cassette protein, and GCN1 reside in a complex that mediates activation of the eIF-2- $\alpha$  kinase GCN2 in aminoacid-starved cells. *EMBO J*. 1995;14(13):3184-99. PubMed PMID: WOS:A1995RH80000022. DOI: [10.1002/j.1460-2075.1995.tb07321.x](https://doi.org/10.1002/j.1460-2075.1995.tb07321.x)
22. Iyer KV, Müller M, Tittel LS, Winz ML. Molecular Highway Patrol for Ribosome Collisions. *ChemBioChem*. 2023:e202300264. DOI: [10.1002/cbic.202300264](https://doi.org/10.1002/cbic.202300264)
23. Lee SJ, Swanson MJ, Sattlegger E. Gcn1 contacts the small ribosomal protein Rps10, which is required for full activation of the protein kinase Gcn2. *Biochemical Journal*. 2015;466(3):547-59. DOI: [10.1042/BJ20140782](https://doi.org/10.1042/BJ20140782)
24. Sattlegger E, Swanson MJ, Ashcraft EA, Jennings JL, Fekete RA, Link AJ, et al. YIH1 is an actin-binding protein that inhibits protein kinase GCN2 and impairs general amino acid control when overexpressed. *Journal of Biological Chemistry*. 2004. DOI: [10.1074/jbc.M404009200](https://doi.org/10.1074/jbc.M404009200)
25. Cambiaghi TD, Pereira CM, Shanmugam R, Bolech M, Wek RC, Sattlegger E, et al. Evolutionarily conserved IMPACT impairs various stress responses that require GCN1 for activating the eIF2 kinase GCN2. *Biochemical and biophysical research communications*. 2014;443(2):592-7. DOI: [10.1016/j.bbrc.2013.12.021](https://doi.org/10.1016/j.bbrc.2013.12.021)
26. Silva RC, Sattlegger E, Castilho BA. Perturbations in actin dynamics reconfigure protein complexes that modulate GCN2 activity and promote an eIF2 response. *J Cell Sci*. 2016;jcs.194738. DOI: [10.1242/jcs.194738](https://doi.org/10.1242/jcs.194738)
27. Waller T, Lee SJ, Sattlegger E. Evidence that Yih1 resides in a complex with ribosomes. *The FEBS journal*. 2012;279(10):1761-76. DOI: [10.1111/j.1742-4658.2012.08553.x](https://doi.org/10.1111/j.1742-4658.2012.08553.x)
28. Roffé M, Hajj GN, Azevedo HF, Alves VS, Castilho BA. IMPACT is a developmentally regulated protein in neurons that opposes the eukaryotic initiation factor 2 $\alpha$  kinase GCN2 in the modulation of neurite outgrowth. *Journal of Biological Chemistry*. 2013;jbc. M113. 461970. DOI: [10.1074/jbc.M113.461970](https://doi.org/10.1074/jbc.M113.461970)
29. Pereira CM, Sattlegger E, Jiang H-Y, Longo BM, Jaqueta CB, Hinnebusch AG, et al. IMPACT, a protein preferentially expressed in the mouse brain, binds GCN1 and inhibits GCN2 activation. *Journal of Biological Chemistry*. 2005;280(31):28316-23. DOI: [10.1074/jbc.M408571200](https://doi.org/10.1074/jbc.M408571200)
30. Ramesh R, Dautel M, Lee Y, Kim Y, Storey K, Gottfried S, et al. Asp56 in actin is critical for the full activity of the amino acid starvation-responsive kinase Gcn2. *FEBS letters*. 2021;595(14):1886-901. DOI: [10.1002/1873-3468.14137](https://doi.org/10.1002/1873-3468.14137)

31. Wout P, Sattlegger E, Sullivan S, Maddock J. *Saccharomyces cerevisiae* Rbg1 protein and its binding partner Gir2 interact on Polyribosomes with Gcn1. *Euk Cell*. 2009;8(7):1061-71. DOI: [10.1128/EC.00356-08](https://doi.org/10.1128/EC.00356-08)
32. Ishikawa K, Ito K, Inoue Ji, Semba K. Cell growth control by stable Rbg2/G ir2 complex formation under amino acid starvation. *Genes to Cells*. 2013;18(10):859-72. DOI: [10.1111/gtc.12082](https://doi.org/10.1111/gtc.12082)
33. Gavin AC, Aloy P, Grandi P, Krause R, Boesche M, Marzioch M, et al. Proteome survey reveals modularity of the yeast cell machinery. *Nature*. 2006;440(7084):631-6. PubMed PMID: ISI:000236350400035. DOI: [10.1038/nature04532](https://doi.org/10.1038/nature04532)
34. Gavin AC, Bosche M, Krause R, Grandi P, Marzioch M, Bauer A, et al. Functional organization of the yeast proteome by systematic analysis of protein complexes. *Nature*. 2002;415(6868):141-7. PubMed PMID: ISI:000173159300033. DOI: [10.1038/415141a](https://doi.org/10.1038/415141a)
35. Ho Y, et al. Systematic identification of protein complexes in *Saccharomyces cerevisiae* by mass spectrometry. *Nature*. 2002;415:180-3. DOI: [10.1038/415180a](https://doi.org/10.1038/415180a)
36. Krogan NJ, Cagney G, Yu HY, Zhong GQ, Guo XH, Ignatchenko A, et al. Global landscape of protein complexes in the yeast *Saccharomyces cerevisiae*. *Nature*. 2006;440(7084):637-43. doi: [10.1038/nature04670](https://doi.org/10.1038/nature04670). PubMed PMID: ISI:000236350400036. DOI: [10.1038/nature04670](https://doi.org/10.1038/nature04670)
37. Geisler S, Collier J. XRN1: a major 5' to 3' exoribonuclease in eukaryotic cells. *The Enzymes*. 2012;31:97-114. DOI: [10.1016/B978-0-12-404740-2.00005-7](https://doi.org/10.1016/B978-0-12-404740-2.00005-7)
38. Ramirez M, Wek RC, De Aldana CV, Jackson BM, Freeman B, Hinnebusch AG. Mutations activating the yeast eIF-2 alpha kinase GCN2: isolation of alleles altering the domain related to histidyl-tRNA synthetases. *Molecular and cellular biology*. 1992;12(12):5801-15. DOI: [10.1128/mcb.12.12.5801-5815.1992](https://doi.org/10.1128/mcb.12.12.5801-5815.1992)
39. Tesina P, Heckel E, Cheng J, Fromont-Racine M, Buschauer R, Kater L, et al. Structure of the 80S ribosome-Xrn1 nuclease complex. *Nature Structural & Molecular Biology*. 2019;26(4):275-80. DOI: [10.1038/s41594-019-0202-5](https://doi.org/10.1038/s41594-019-0202-5)
40. Falco S, Dumas K. Genetic analysis of mutants of *Saccharomyces cerevisiae* resistant to the herbicide sulfometuron methyl. *Genetics*. 1985;109(1):21-35. DOI: [10.1093/genetics/109.1.21](https://doi.org/10.1093/genetics/109.1.21)
41. Jones GM, Stalker J, Humphray S, West A, Cox T, Rogers J, et al. A systematic library for comprehensive overexpression screens in *Saccharomyces cerevisiae*. *Nature methods*. 2008;5(3):239. DOI: [10.1038/nmeth.1181](https://doi.org/10.1038/nmeth.1181)
42. Huh W-K, Falvo JV, Gerke LC, Carroll AS, Howson RW, Weissman JS, et al. Global analysis of protein localization in budding yeast. *Nature*. 2003;425(6959):686-91. DOI: [10.1038/nature02026](https://doi.org/10.1038/nature02026)
43. Mueller PP, Hinnebusch AG. Multiple upstream AUG codons mediate translational control of GCN4. *Cell*. 1986;45(2):201-7. DOI: [10.1016/0092-8674\(86\)90384-3](https://doi.org/10.1016/0092-8674(86)90384-3)
44. Larimer FW, Stevens A. Disruption of the gene XRN1, coding for a 5'→3' exoribonuclease, restricts yeast cell growth. *Gene*. 1990;95(1):85-90. DOI: [10.1016/0378-1119\(90\)90417-p](https://doi.org/10.1016/0378-1119(90)90417-p)
45. Wek R, Cannon J, Dever T, Hinnebusch A. Truncated protein phosphatase GLC7 restores translational activation of GCN4 expression in yeast mutants defective for the eIF-2 alpha kinase GCN2. *Molecular and Cellular Biology*. 1992;12(12):5700-10. DOI: [10.1128/mcb.12.12.5700-5710.1992](https://doi.org/10.1128/mcb.12.12.5700-5710.1992)
46. Dong J, Qiu H, Garcia-Barrio M, Anderson J, Hinnebusch AG. Uncharged tRNA activates GCN2 by displacing the protein kinase moiety from a bipartite tRNA-binding domain. *Molecular cell*. 2000;6(2):269-79. DOI: [10.1016/s1097-2765\(00\)00028-9](https://doi.org/10.1016/s1097-2765(00)00028-9)
47. Qiu H, Dong J, Hu C, Francklyn CS, Hinnebusch AG. The tRNA-binding moiety in GCN2 contains a dimerization domain that interacts with the kinase domain and is required for tRNA binding and kinase activation. *The EMBO journal*. 2001;20(6):1425-38. DOI: [10.1093/emboj/20.6.1425](https://doi.org/10.1093/emboj/20.6.1425)
48. Qiu H, Hu C, Dong J, Hinnebusch AG. Mutations that bypass tRNA binding activate the intrinsically defective kinase domain in GCN2. *Genes & development*. 2002;16(10):1271-80. DOI: [10.1101/gad.979402](https://doi.org/10.1101/gad.979402)

49. Solinger JA, Pascolini D, Heyer W-D. Active-site mutations in the Xrn1p exoribonuclease of *Saccharomyces cerevisiae* reveal a specific role in meiosis. *Molecular and Cellular Biology*. 1999;19(9):5930-42. DOI: [10.1128/MCB.19.9.5930](https://doi.org/10.1128/MCB.19.9.5930)
50. He F, Li X, Spatrick P, Casillo R, Dong S, Jacobson A. Genome-wide analysis of mRNAs regulated by the nonsense-mediated and 5' to 3' mRNA decay pathways in yeast. *Molecular cell*. 2003;12(6):1439-52. DOI: [10.1016/s1097-2765\(03\)00446-5](https://doi.org/10.1016/s1097-2765(03)00446-5)
51. Jones CI, Zabolotskaya MV, Newbury SF. The 5'→3' exoribonuclease XRN1/Pacman and its functions in cellular processes and development. *Wiley Interdisciplinary Reviews: RNA*. 2012;3(4):455-68. DOI: [10.1002/wrna.1109](https://doi.org/10.1002/wrna.1109)
52. Vaškovičová K, Awadová T, Veselá P, Balážová M, Opekarová M, Malinsky J. mRNA decay is regulated via sequestration of the conserved 5'-3' exoribonuclease Xrn1 at eisosome in yeast. *European Journal of Cell Biology*. 2017;96(6):591-9. DOI: [10.1016/j.ejcb.2017.05.001](https://doi.org/10.1016/j.ejcb.2017.05.001)
53. Cesareni G, Murray JA. Plasmid vectors carrying the replication origin of filamentous single-stranded phages. *Genetic engineering*: Springer; 1987. p. 135-54. [https://doi.org/10.1007/978-1-4684-5377-5\\_9](https://doi.org/10.1007/978-1-4684-5377-5_9)
54. Sikorski RS, Hieter P. A system of shuttle vectors and yeast host strains designed for efficient manipulation of DNA in *Saccharomyces cerevisiae*. *Genetics*. 1989;122(1):19-27. DOI: [10.1093/genetics/122.1.19](https://doi.org/10.1093/genetics/122.1.19)
55. Christianson TW, Sikorski RS, Dante M, Shero JH, Hieter P. Multifunctional yeast high-copy-number shuttle vectors. *Gene*. 1992;110(1):119-22. DOI: [10.1016/0378-1119\(92\)90454-w](https://doi.org/10.1016/0378-1119(92)90454-w)
56. Johnston M, Davis R. Sequences that regulate the divergent GAL1-GAL10 promoter in *Saccharomyces cerevisiae*. *Molecular and cellular biology*. 1984;4(8):1440-8. DOI: [10.1128/mcb.4.8.1440-1448.1984](https://doi.org/10.1128/mcb.4.8.1440-1448.1984)
57. Ghuge AA AR, Gottfried S, Daube C, Koloamatangi SMBMJ, Schiemann AH, Sattlegger E. Rapid Screen for Functionally Relevant Amino Acids (RS-FRAA) in a protein, using the yeast *Saccharomyces cerevisiae* as the host organism. . *Star Protocols*. DOI: [10.1016/j.xpro.2022.101545](https://doi.org/10.1016/j.xpro.2022.101545)
58. Lee SJ, Ramesh R, de Boor V, Gebler JM, Silva RC, Sattlegger E. Cost-effective and rapid lysis of *Saccharomyces cerevisiae* cells for quantitative western blot analysis of proteins, including phosphorylated eIF2 $\alpha$ . *Yeast*. 2017;34(9):371-82. DOI: [10.1002/yea.3239](https://doi.org/10.1002/yea.3239)
59. Visweswaraiiah J, Dautel M, Sattlegger E. Generating highly concentrated yeast whole cell extract using low-cost equipment. *Nature Protocol Exchange*. 2011. <https://doi.org/10.1038/protex.2011.212>
60. Bradford MM. A rapid and sensitive method for the quantitation of microgram quantities of protein utilizing the principle of protein-dye binding. *Analytical biochemistry*. 1976;72(1-2):248-54. DOI: [10.1006/abio.1976.9999](https://doi.org/10.1006/abio.1976.9999)
61. Visweswaraiiah J, Lageix, S, Castilho BA, Izotova L, Kinzy TG, Hinnebusch AG, and Sattlegger E. Evidence that eukaryotic translation elongation factor 1A (eEF1A) binds the Gcn2 C-terminus and inhibits Gcn2 activity. *J Biol Chem*. 2011;286:36568-79. DOI: [10.1074/jbc.M111.248898](https://doi.org/10.1074/jbc.M111.248898)
62. Foiani M, Cigan A, Paddon CJ, Harashima S, Hinnebusch A. GCD2, a translational repressor of the GCN4 gene, has a general function in the initiation of protein synthesis in *Saccharomyces cerevisiae*. *Molecular and cellular biology*. 1991;11(6):3203-16. DOI: [10.1128/mcb.11.6.3203-3216.1991](https://doi.org/10.1128/mcb.11.6.3203-3216.1991)



801 Table I: Strains used in this study  
802

| strain                                            | genotype                                                                                       | source        |
|---------------------------------------------------|------------------------------------------------------------------------------------------------|---------------|
| <b>Genetic background H1511</b>                   |                                                                                                |               |
| H1511                                             | <i>MATa ura3-52 trp1-63 leu2-3,112, GAL2<sup>+</sup></i>                                       | [62]          |
| H2556                                             | same as H1511 but <i>gcn1Δ</i>                                                                 | [6]           |
| H2557                                             | same as H1511 but <i>gcn2Δ</i>                                                                 | [6]           |
| <b>Genetic background BY4741 or BY4742</b>        |                                                                                                |               |
| BY4741                                            | <i>MATa his3Δ1 leu2Δ0 met15Δ0 ura3Δ0</i>                                                       | Dharmacon     |
| BY4742                                            | <i>MATa his3Δ1 leu2Δ0 lys2Δ0 ura3Δ0</i>                                                        | Dharmacon     |
| <i>xrn1Δ</i> strain                               | same as BY4741 but <i>xrn1Δ::KanMX4</i>                                                        | Dharmacon     |
| Xrn1-mEGFP strain                                 | same as BY4742 but mEGFP is inserted into the <i>XRN1</i> ORF after the Ser-S235 triplet codon | [39]          |
| EMSY6053-3-1                                      | same as BY4741 but <i>gcn2Δ::HisG</i>                                                          | [24]          |
| PGK1-GFP strain                                   | same as BY4741 but <i>PGK1-GFP<sup>a</sup></i>                                                 | Thermo Fisher |
| GCN20-GFP strain                                  | same as BY4741 but <i>GCN20-GFP<sup>a</sup></i>                                                | Thermo Fisher |
| XRN1-GFP strain                                   | same as BY4741 but <i>XRN1-GFP<sup>a</sup></i>                                                 | Thermo Fisher |
| <i>a</i> epitope tag at the C-terminus of the ORF |                                                                                                |               |

804 Table II: Plasmids used in this study  
805

| plasmid                                                        | gene                                                                                                               | selectable marker                   | vector            | source     |
|----------------------------------------------------------------|--------------------------------------------------------------------------------------------------------------------|-------------------------------------|-------------------|------------|
| <b>Yeast gene fusions, under Galactose inducible promotor</b>  |                                                                                                                    |                                     |                   |            |
| pDH114                                                         | <i>Flag-His<sub>6</sub><sup>a</sup>-GCN2-E803V</i> (coding for Gcn2 <sup>c</sup> )                                 | <i>Amp<sup>R</sup>, URA3, leu2d</i> | pEMBLyex, 2μ      | [46]       |
| pHQ1213                                                        | <i>Flag-His<sub>6</sub><sup>a</sup>-GCN2[591-1010]<sup>b</sup>-R794G,F842L</i> (coding for Gcn2 <sup>hyper</sup> ) | <i>Amp<sup>R</sup>, URA3, leu2d</i> | pEMBLyex, 2μ      | [48]       |
| pDH103                                                         | <i>Flag-His<sub>6</sub><sup>a</sup>-GCN2</i>                                                                       | <i>Amp<sup>R</sup>, URA3, leu2d</i> | pEMBLyex, 2μ      | [48]       |
| <b>Yeast genes, under own promotor</b>                         |                                                                                                                    |                                     |                   |            |
| pRS1                                                           | <i>XRN1</i>                                                                                                        | <i>Amp<sup>R</sup>, URA3</i>        | pRS316, CEN/ARSH4 | this study |
| pRA1001                                                        | <i>XRN1</i>                                                                                                        | <i>Amp<sup>R</sup>, URA3</i>        | pRS316, CEN/ARSH4 | this study |
| pRA1002                                                        | <i>XRN1-myc<sup>x3</sup></i>                                                                                       | <i>Amp<sup>R</sup>, URA3</i>        | pRS316, CEN/ARSH4 | this study |
| pRA1003                                                        | <i>xrn1-D206A-myc<sup>x3</sup></i>                                                                                 | <i>Amp<sup>R</sup>, URA3</i>        | pRS316, CEN/ARSH4 | this study |
| pRA1004                                                        | <i>xrn1-D208A-myc<sup>x3</sup></i>                                                                                 | <i>Amp<sup>R</sup>, URA3</i>        | pRS316, CEN/ARSH4 | this study |
| pRA1005                                                        | <i>xrn1-D206A;D208A-myc<sup>x3</sup></i>                                                                           | <i>Amp<sup>R</sup>, URA3</i>        | pRS316, CEN/ARSH4 | this study |
| p238                                                           | <i>GCN4</i>                                                                                                        | <i>Amp<sup>R</sup>, URA3</i>        | YCp50, ARS1/CEN4  | [43]       |
| <b>Tiling collection plasmids, with yeast genome fragments</b> |                                                                                                                    |                                     |                   |            |
| pGP564                                                         | empty vector                                                                                                       | <i>Amp<sup>R</sup>, LEU2</i>        | pGP564, 2μ        | Dharmacon  |
| YGPM33c11                                                      | Genome fragment contains: <i>BUD1<sup>e</sup>, XRN1, NUP49, ROK1, SPO74, tK(CUU)G2, SUA5<sup>e</sup></i>           |                                     |                   | Dharmacon  |
| YGPM19a16                                                      | Genome fragment contains: <i>MPT5<sup>e</sup>, YGL177W,<sup>d</sup> YGL176C, SAE2, BUD13, KEM<sup>e</sup></i>      |                                     |                   | Dharmacon  |

806 *a* epitope tag at the N-terminus of the ORF  
807 *b* numbers in brackets indicate amino acids encoded by the respective gene  
808 *c* The *GCN4* 3' UTR lacks the uORF, leading to constitutive *GCN4* translation  
809 *d* ORF intact, but up/downstream regulatory elements may be missing  
810 *e* ORF truncated  
811

## Figure legends

**Figure 1: (A) *XRN1* deletion renders cells sensitive to Sulfometuron methyl (SM). Left panel:** The yeast strains deleted for the indicated gene, and the isogenic wild-type strain (WT), were grown to saturation, subjected to 10-fold serial dilutions, and 5  $\mu$ l of each dilution transferred to solid medium containing 1  $\mu$ g/mL SM or not (control). **Right panel:** The same assay was performed, just that cells were grown to exponential phase in liquid medium to an OD of 1, before conducting the semi-quantitative growth assay. **(B) *XRN1* deletion leads to reduced levels of phosphorylated eIF2 $\alpha$  (eIF2 $\alpha$ -P).** The indicated strains were grown to exponential phase, and then exposed for 1 h to 1  $\mu$ g/mL SM, or not (control) before harvesting. Whole cell extracts were generated and subjected to SDS-PAGE and westerns using antibodies specific against the phosphorylated form of eIF2 $\alpha$ , and Pgk1 as loading control. A representative result is shown. **(C)** Western signals in (B) were quantified and the eIF2 $\alpha$ -P levels determined relative to that of Pgk1, and plotted in a bar graph relative to the eIF2 $\alpha$ -P/Pgk1 ratio of the non-starved wild-type. Error bars depict the standard error, and stars indicate significant differences between values (student t-test,  $p \leq 0.05$ ). Quantifications were performed from 4 biological replicates.

**Figure 2: The SM<sup>s</sup> phenotype of the *xrn1 $\Delta$*  strain is complemented by a plasmid containing the intact *XRN1* gene.** Wild-type strain BY4741, and isogenic *xrn1 $\Delta$*  and *gcn1 $\Delta$*  strains as indicated on the far right, were transformed with vector pRS425 or the tiling plasmids as indicated (YGPM19a16 (plasmid<sup>#</sup>), YGPM33c11 (plasmid<sup>##</sup>)). Transformants were subjected to semi-quantitative growth assays as done in Fig.1A, left panel. A map of the genes present in each tiling plasmid is shown.

**Figure 3: Plasmid borne *XRN1* reverts the SM<sup>s</sup> of the *xrn1 $\Delta$*  strain. (A)** The indicated strains were transformed with vector alone or a plasmid containing *XRN1* under its endogenous promotor (plasmids pRS316 and pRS1). Then, independent transformants were subjected to a semi-quantitative growth assay as done in Fig. 2. Plasmid pRS1 contains an *XhoI-XbaI* genomic DNA fragment that harbours the *XRN1* ORF in addition to fractions of the ORFs coding for *BUD13* and *NUP49*, as indicated in the figure. **(B)** Transformants from (A), as indicated, were subjected to immunoblotting as described in Fig. 1B. Lanes 1&2, 3&4, 5&6, 7&8, respectively, are independent transformants. **(C)** The eIF2 $\alpha$ -P levels were quantified as done in Fig. 1C, using data from 4 biological replicates.

**Figure 4: Xrn1 co-precipitates Gcn1 and Gcn2. (A)** Cells expressing proteins with a C-terminal GFP tag as indicated, expressed from their endogenous chromosomal location and their endogenous promotor, were grown to exponential phase, and harvested. Whole cell extracts were generated and equal amounts of whole cell extract subjected to GFP-tag mediated co-immunoprecipitation assays. As input control, whole cell extract was loaded, representing 1% (lanes 1,2) or 3% (lanes 3,4) of the amount used in the co-precipitation experiments. Precipitates were subjected to SDS-PAGE and immunoblotting using antibodies against GFP, Gcn1, Gcn2, Gcn20, and Pgk1. Note that Pgk1-GFP migrates slower than Pgk1, and for that reason no signal can be detected for Pgk1-GFP in the membrane strip used for probing with the Pgk1 antibody. Pgk1-GFP can be readily detected with the GFP antibody. Black arrowhead points to the weak signal of Xrn1-GFP in the input lane. In the immunoprecipitate lanes (lanes 5-8) untagged Gcn20 and Gcn20-GFP are indicated with a white star and a white arrowhead, respectively. A representative of 3 independent experiments is shown. **(B)** Quantitation of Gcn1 and Gcn2 signals from (A) are shown. Gcn1 and Gcn2 signals from the precipitates were quantified relative to that of the input, and relative to the values of the WT precipitate.

**Figure 5: Constitutively expressed Gcn4 reverts the SM<sup>s</sup> phenotype elicited by the *XRN1* deletion.** (A) The wild-type strain and its isogenic *xrn1Δ* strain were transformed with vector alone (YCp50) or a plasmid harbouring *GCN4* under its own promoter but lacking the inhibitory uORFs in its 5' mRNA untranslated region (dubbed *GCN4<sup>c</sup>*) (p238). Transformants were then subjected to semi-quantitative growth assays as done in Fig. 1A. (B) Quantitative evaluation of the strains' sensitivity to SM in (A). As outlined in more detail in the materials and methods section, the growth defect of the strains seen under non-starvation conditions (control) was accounted for when determining the growth rates on the starvation medium (SM). The growth rates were then plotted on a bar graph, relative to that of the wild-type strain harbouring vector alone. Error bars depict the standard error, and stars indicate significant differences between values (student t-test,  $p \leq 0.05$ ).

**Figure 6: Deletion of *XRN1* does not revert the growth defect associated with constitutively active Gcn2.** (A) Strains deleted for the indicated gene, or isogenic wild-type strain BY4741, were transformed with vector alone (pEMBLyex4), or a plasmid expressing from a galactose inducible promoter constitutively active Gcn2<sup>c</sup> or Gcn2<sup>hyper</sup> (pDH114, pHQ1213), or wild-type Gcn2 (Gcn2<sup>WT</sup>, pDH103). Transformants were then subjected to semi-quantitative growth assays as done in Fig. 2, but on medium containing glucose or galactose. (B) The level of phosphorylated eIF2α was determined via western blotting as described in Fig. 1B, except that *xrn1Δ* cells were grown to exponential phase in medium containing raffinose, and then galactose added. Cells were harvested 3.5, 6, and 7.5 hours thereafter. (C) The level of phosphorylated eIF2α, as well as the level of endogenous Gcn1 was determined as described in (B), using antibodies against eIF2α, Gcn1, and Pgk1, with exposure to galactose for 6 hrs before harvesting. For more detail see text. (D) The level of FLAG-tagged Gcn2<sup>c</sup> and Gcn2<sup>hyper</sup> was determined as described in (C), using antibodies against FLAG, and Pgk1. (E) The eIF2α-P signals in (C) were quantified relative to that of wild-type containing vector alone, as done in Fig.1C. The average of at least 4 biological replicates is shown, as well as the standard error.

**Figure 7: Xrn1 unable to bind to ribosomes is still able to complement the SM<sup>s</sup> phenotype of a *xrn1Δ* strain.** Strains harbouring Xrn1 (strain BY4742 in row 1, and BY4741 in row 2), Xrn1 containing an internal mEGFP tag that sterically hinders ribosome binding (Xrn1-mEGFP), or C-terminally GFP-tagged Xrn1, and a *xrn1Δ* and *gcn1Δ* strain, were subjected to semi-quantitative growth assays as done in Fig. 1A. Strains with mating type a are Met auxotrophic, and with mating type α are Lys auxotrophic. The wild-types differing in the mating type and the according auxotrophies (rows 1 and 8) did not show differences in growth on SM, implying that the difference in mating type and auxotrophies did not affect the sensitivity to SM.

**Figure 8: Enzymatically inactive Xrn1 is unable to complement the SM<sup>s</sup> phenotype of a *xrn1Δ* strain.** (A) Strains expressing proteins as indicated were subjected to a semi-quantitative growth assays as done in Fig. 2. (B) Transformants from (A), as indicated, were subjected to immunoblotting as described in Fig. 1B, except that the cells were not starved, using antibodies against the myc tag present at the C-terminus of Xrn1, and against Pgk1. Lanes 1&2, 3&4, 5&6, 7&8, 9&10, respectively, are independent transformants. (C) The Xrn1 protein level was quantified relative to that of wild-type Xrn1, as done in Fig.1C. Quantifications were performed from four biological replicates.

**Figure 9: Deletion of *XRN1* does not lead to reduced levels of Gcn1 or Gcn2.** (A,B) Strains harbouring empty vector or a plasmid expressing myc tagged Gcn1 from its native promoter, as indicated, were grown in liquid medium to exponential phase. Cells were harvested, and the whole cell extract used for immunoblotting as done in Fig. 8B, using antibodies against the myc tag, Gcn2, and Pgk1 as loading control. (C) The Gcn1 and Gcn2 protein levels were quantified relative to that of the wild-type, as done in Fig.1C. Quantifications were performed from four biological replicates.

915  
916

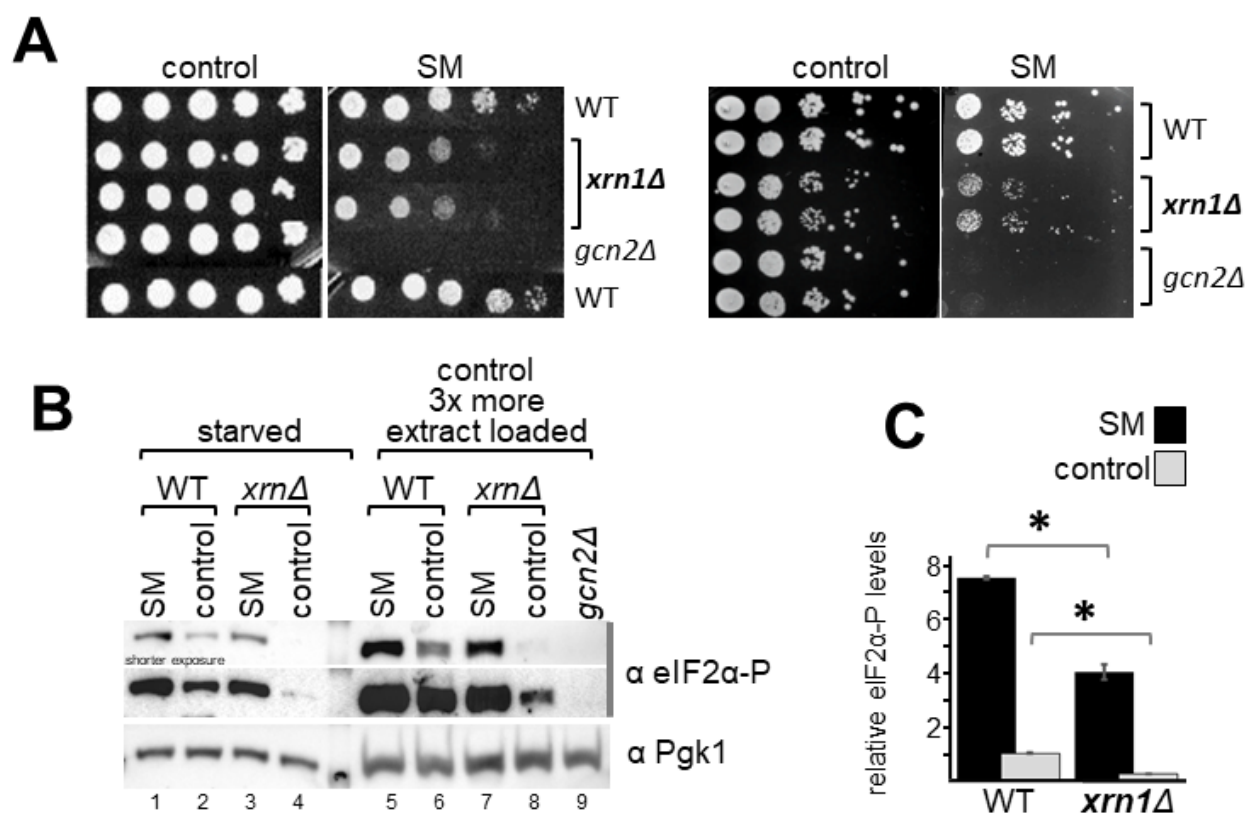

**Figure 1**



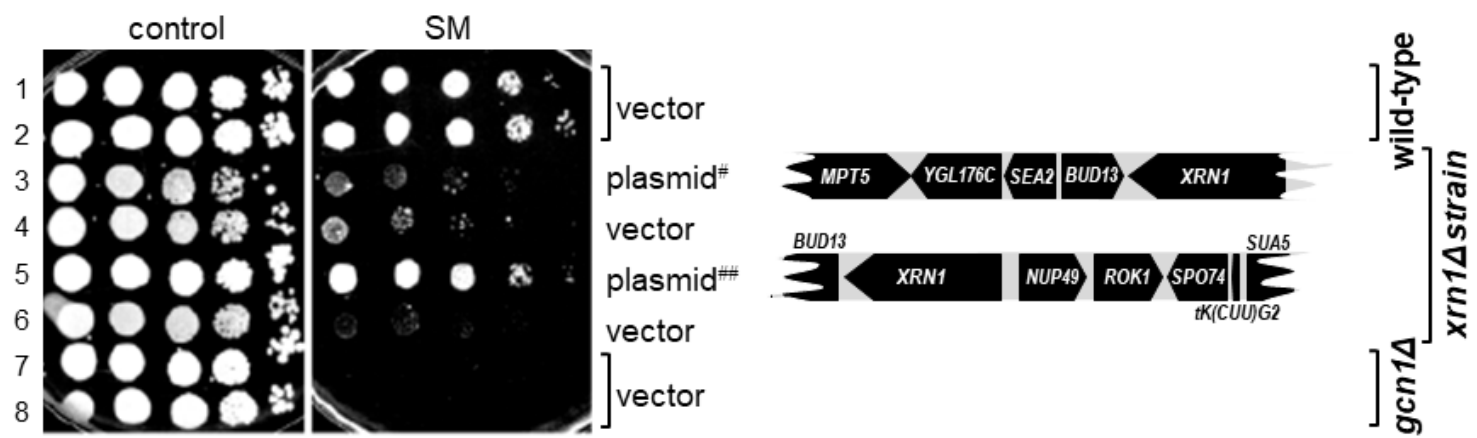

Figure 2

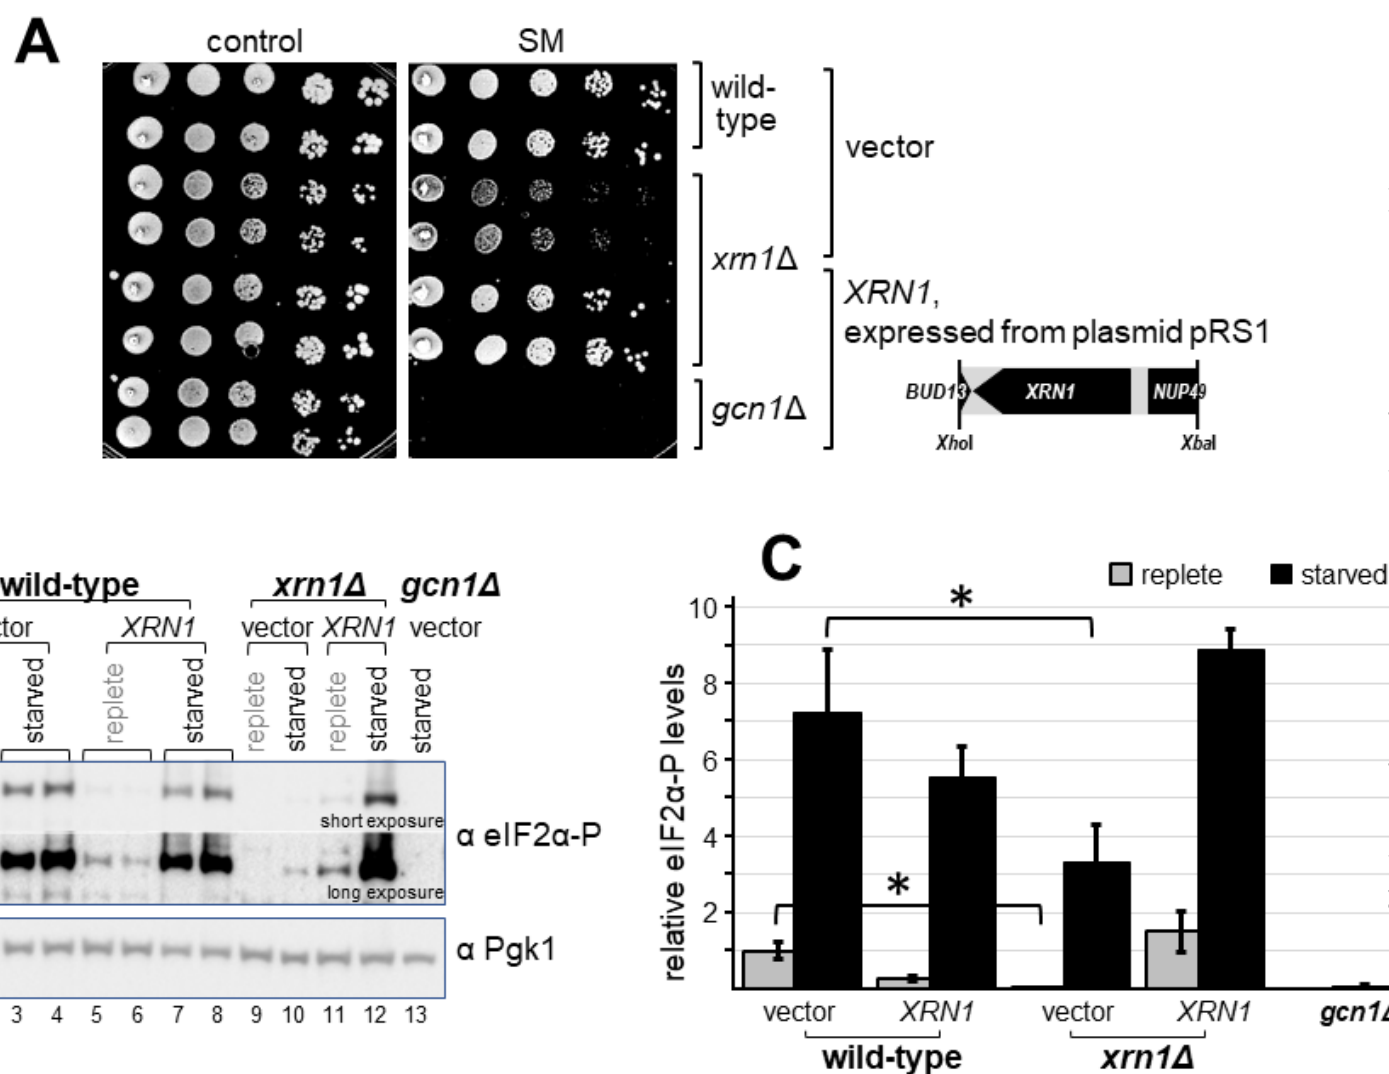

**Figure 3**

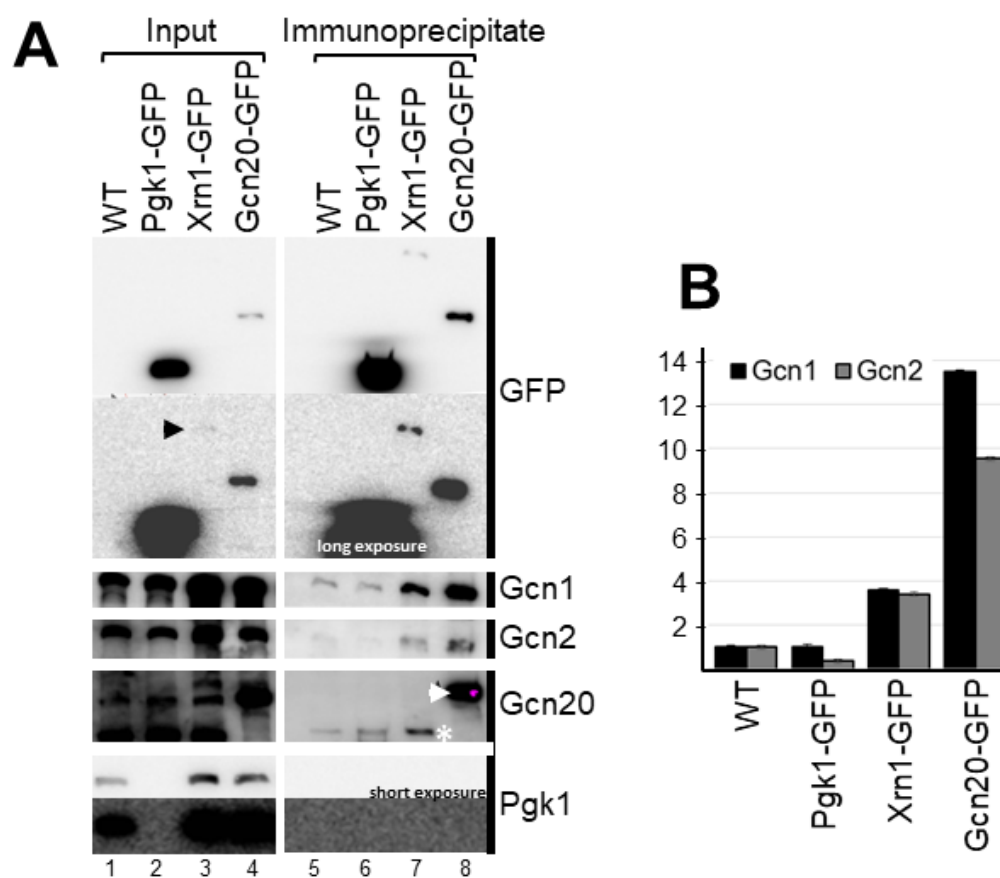

**Figure 4**

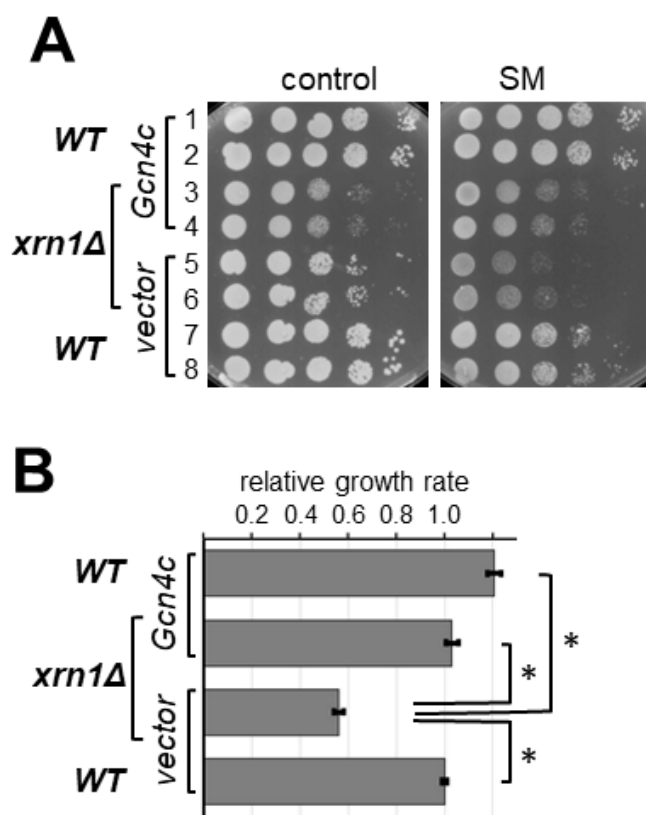

**Figure 5**

# Figure 6

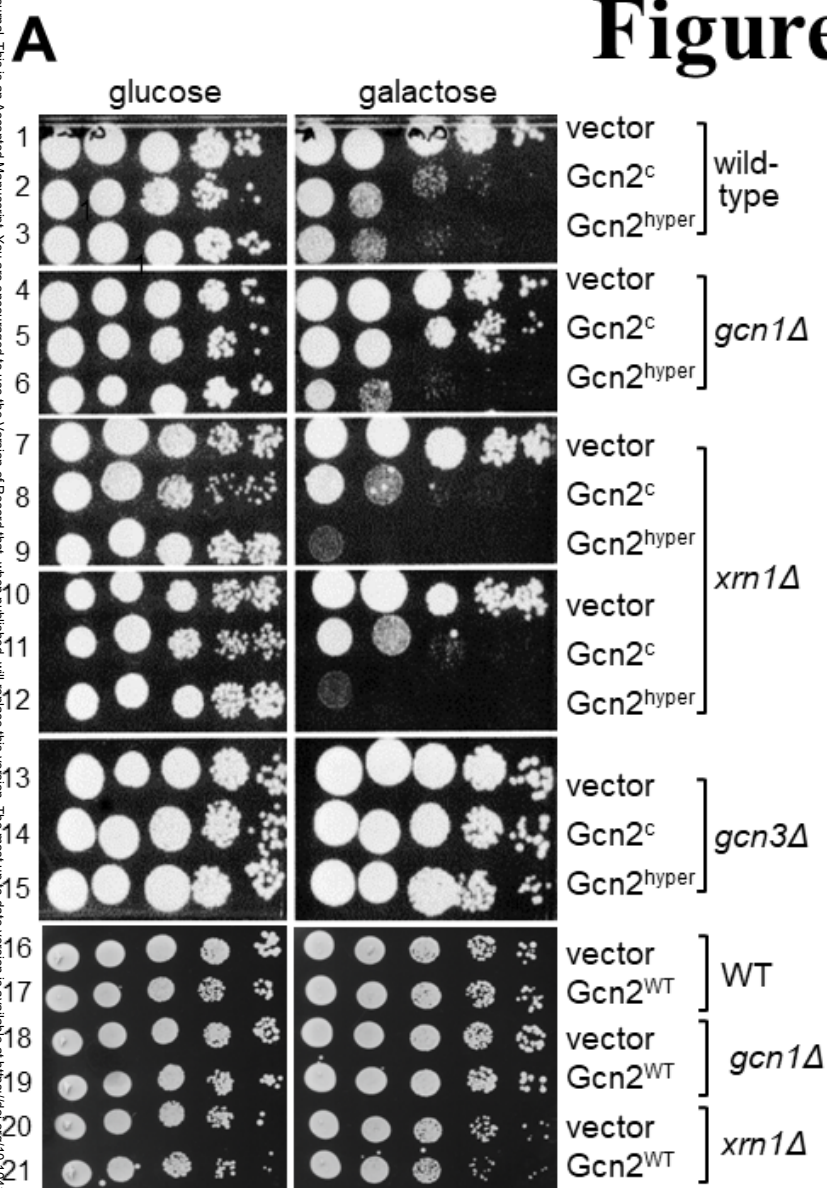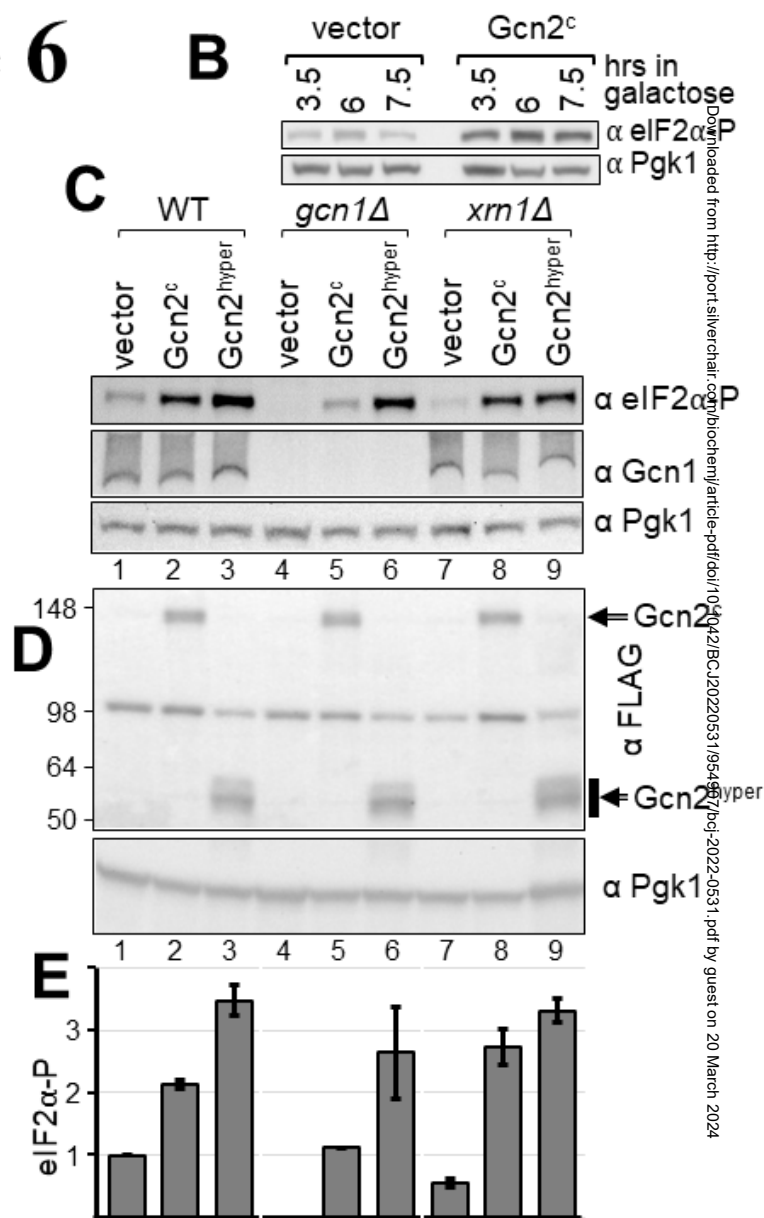



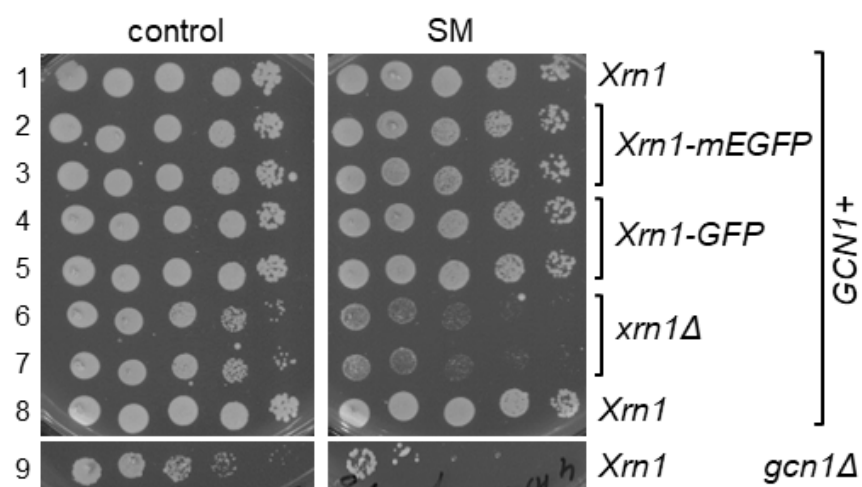

**Figure 7**

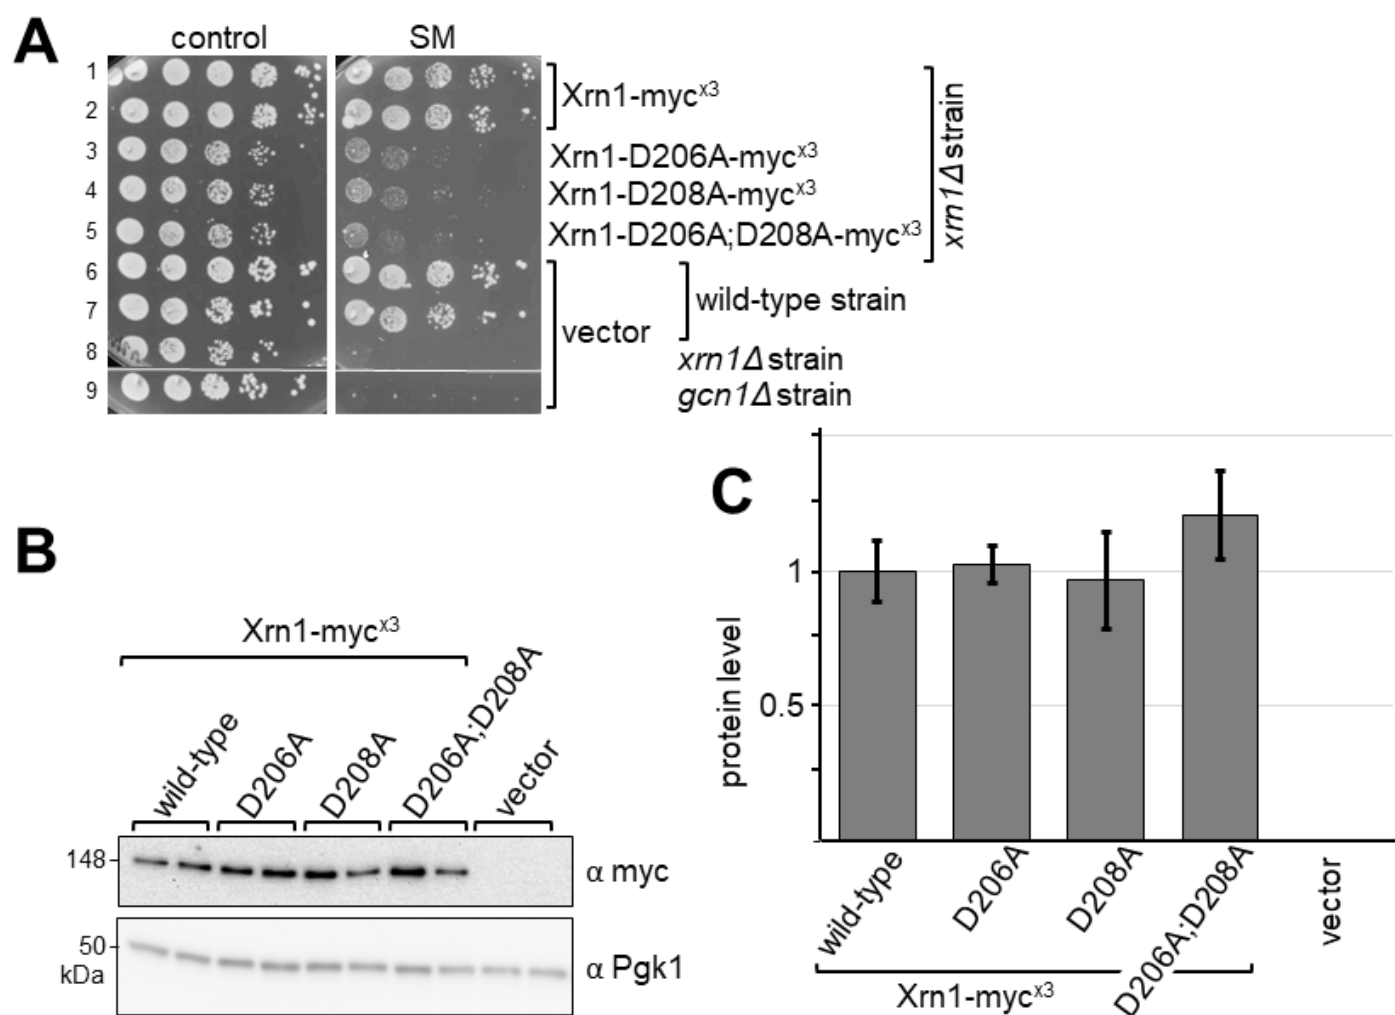

**Figure 8**

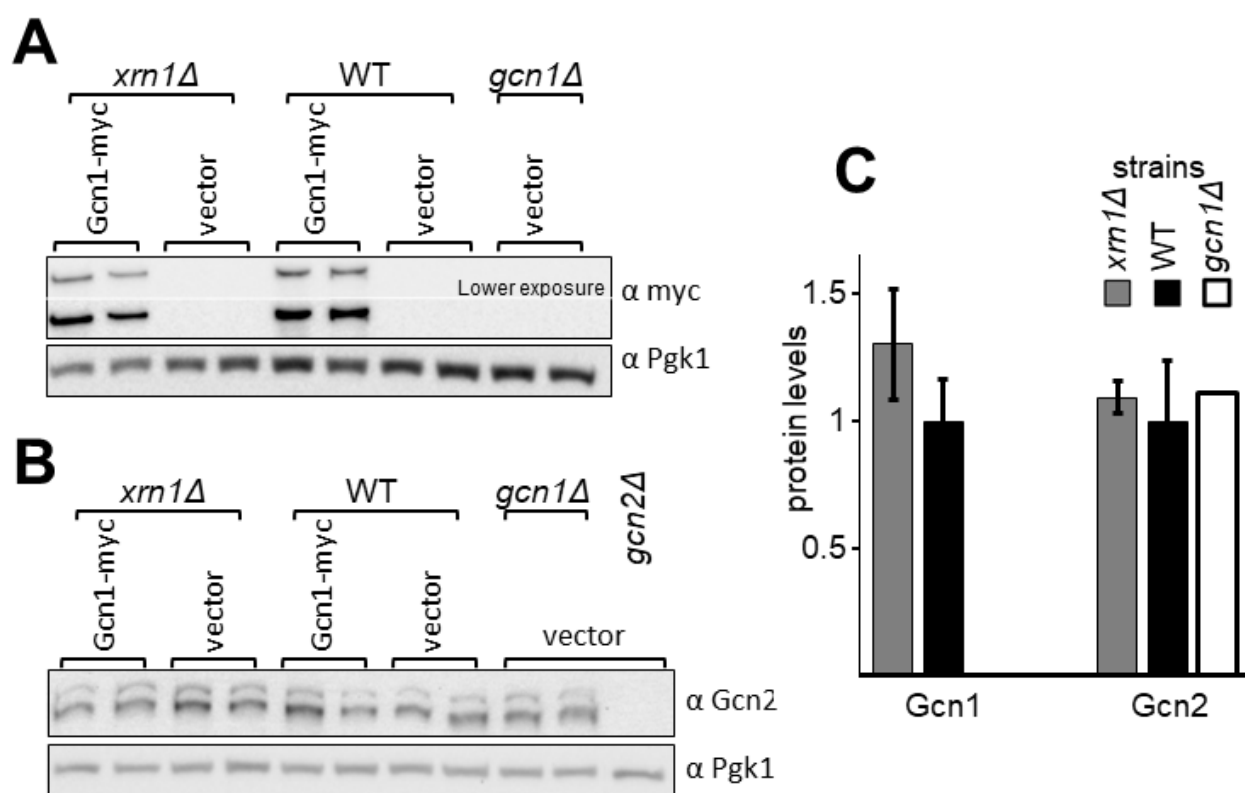

**Figure 9**
